# Supplementary material for: Implicit racial biases are lower in more populous more diverse and less segregated US cities
Source: Springer Nature journal article supplement (doi:10.1038/s41467-024-45013-8), 2024-02-06
Supplement: MOESM1 [file 41467_2024_45013_MOESM1_ESM.pdf › 41467_2024_45013_MOESM1_ESM.pdf]

## Supplementary Note

Here we reproduce the parts of our previously developed extension to the standard Urban Scaling Theory model [1] that are relevant for inter-group interactions and implicit racial biases.

The extension on which this manuscript is based starts from the standard formulation of Urban scaling theory [2, 3], which describes cities as spatially embedded networks of socio-economic interactions.

For the average per-capita number of social interactions,  $k$ , the urban scaling relationship takes form of  $k \sim N^\delta$ , where  $\delta = \frac{1}{6}$ . This form of the scaling relationship results from a mean-field approximation that individuals interact homogeneously. Under these conditions, we take individuals to have an interaction cross section  $a_0$  and a characteristic travel length  $l$  per unit time. This gives the average number of interactions for a large city ( $N \gg 1$ ) as :

$$k \sim \frac{a_0 l}{A_n} N \quad (1)$$

, where  $A_n$  is the area of the city's networks. The scaling relationship for the area of the city's networks,  $A_n \sim N^{1-\delta}$  [2], recovers the scaling relationship for  $k$ .

In order to derive the model for heterogeneous group interactions it is important to understand the standard formulation of the scaling relationship for interactions. We start by observing that,  $\frac{a_0 l}{A_n}$  is a probability composed of the fraction of a city's area that individuals cover, on average, over a given time period. This is the average probability of interacting with other individuals in the city. Thus, the total expected number of interactions for each individual is given by their probability of interacting,  $\frac{a_0 l}{A_n}$ , multiplied by the number of individuals they could interact with,  $N$ .

Next, we extend this standard formulation by modeling each individual in the city as belonging to some distinct number of groups, indexed by  $g$ . Individuals in these groups may interact with a lower probability with other groups. We define this relative reduction in out-group inter-

actions by  $1 - h_g^{bet}$ , where  $h_g^{bet} \in [0, 1]$  is the segregation of group  $g$ .

With these definitions, the average number of interactions for individuals in group  $g$  with individuals in different groups is given by:

$$k_{g,inter} \sim \frac{a_0 l}{A} \sum_{j \neq g} N_j (1 - h_g^{bet}) \quad (2)$$

where  $N_g$  is the population of focal group  $g$ . The total number of between-group social interactions for all individuals in group  $g$  is  $k_{g,inter} N_g$ , on average. Therefore, the average number of between-group social interactions for individuals in an observed segregated city  $i$  with  $G$  different groups, is  $k_i \sim \frac{1}{N} \sum_{g=1}^G k_{g,inter,i} N_{g,i}$ .

This brings us almost to Equation 2 of the main text:

$$k_{i,inter} \sim \frac{a_0 l}{A_i N_i} \sum_{j \neq g} N_{j,i} (1 - h_{g,i}^{bet}) \cdot N_{g,i} \quad (3)$$

Multiplying and dividing through by  $N_i^2$  we have:

$$k_{i,inter} \sim \frac{a_0 l N_i^2}{A_i N_i} \sum_{j \neq g} \frac{N_{j,i}}{N_i} \frac{N_{g,i}}{N_i} (1 - h_{g,i}^{bet}). \quad (4)$$

which directly simplifies to the between-group interactions terms of Equation 2 of the main text:

$$k_{i,inter} \sim N^\delta \sum_{j \neq g} \frac{N_{j,i}}{N_i} \frac{N_{g,i}}{N_i} (1 - h_{g,i}^{bet}). \quad (5)$$

since  $\frac{a_0 l N_i}{A_i} \sim N^\delta$ .

Note that when segregation is complete, i.e.,  $h_{g,i}^{bet} = 0$  or there is only one group in the city,  $k_{i,inter}$  goes to 0, as expected, and there are no between-group interactions.

As a note, in general, segregation values need not be the same across all groups and we can define a matrix with entries  $\in [-1, 1]$  which specifies the degree to which individuals avoid or preferentially interact with individuals from the same or other groups:

$$H_i = \begin{bmatrix} h_{11i} & h_{12i} & \cdots & h_{1Gi} \\ h_{21i} & h_{22i} & \cdots & h_{2Gi} \\ \vdots & \vdots & \ddots & \vdots \\ h_{G1i} & h_{G2i} & \cdots & h_{GGi} \end{bmatrix} \quad (6)$$

The relative rate of interactions between any two groups (or within a group) is given by  $1 + H_i$ . In the model presented here, we constrain  $H$  so that each group avoids all other groups equally and that there are repeated off-diagonal entries that are all negative. Specifically, that  $h_{g,i}^{bet} = h_{gji}$  for all  $j \neq g$ .

This notation allows for an alternative notation for Equation 5:

$$k_{i,inter} \sim \frac{a_0 l}{A_i N_i} \text{tr} ([1 - \mathbf{I}] \mathbf{N}_i H_i \mathbf{N}_i) \quad (7)$$

where  $\mathbf{N}_i$  is the diagonal matrix of group sizes and  $I$  is the identity matrix. In other words, between-group interactions are given by the sum of off-diagonal elements of  $\mathbf{N}_i H \mathbf{N}_i$ .

### Inter-group interactions with two groups

In the case of two groups, the inter-group term of Equation 3 of the main text becomes:

$$k_{i,inter} \sim N_i^\delta [2 \cdot \frac{N_{1,i}}{N_i} \frac{N_{2,i}}{N_i} - \frac{N_{1,i}}{N_i} \frac{N_{2,i}}{N_i} h_{1,i}^{bet} - \frac{N_{1,i}}{N_i} \frac{N_{2,i}}{N_i} h_{2,i}^{bet}] \quad (8)$$

Replacing  $N_{2,i}$  with  $N_i - N_{1,i}$  and simplifying results in:

$$k_{i,inter} \sim N_i^\delta [(\frac{N_{1,i}}{N_i} \frac{N_i - N_{1,i}}{N_i}) \cdot (2 - h_{1,i}^{bet} - h_{2,i}^{bet})] \quad (9)$$

which simplifies directly to Equation 3 of the main text when using a power-law learning curve to couple inter-croup interactions to implicit bias levels.

### A Measure of Relative Mixing

Here, we compare our model in the main text to one which uses a measure of relative mixing.

We start with the ratio:

$$k_{inter}/k_{within} \sim \frac{(\frac{N_1}{N} - (\frac{N_1}{N})^2)(2 - h_1^{bet} - h_2^{bet})}{(\frac{N_1}{N})^2(1 + h_1^{in}) + (\frac{N_2}{N})^2(1 + h_2^{in})} \quad (10)$$

If we let the homophily and segregation terms be zero, for the moment:

$$k_{inter}/k_{within} \sim \frac{(\frac{N_1}{N} - (\frac{N_1}{N})^2)}{((\frac{N_1}{N})^2 + (\frac{N-N_1}{N})^2)} \quad (11)$$

where we have substituted  $N_2 = N - N_1$ . Expanding out the terms in the denominator and substituting  $d = \frac{N_1}{N} - (\frac{N_1}{N})^2$ , with  $d \in [0, .25]$ , we can write:

$$k_{inter}/k_{within} \sim \frac{d}{1 - 2d} \quad (12)$$

We can directly compare this measure with the diversity part of  $k_{inter}$ , i.e.  $d$  by looking at the variance explained and information criteria of the two linear models,  $\ln(b) \sim \ln(\frac{d}{1-2d})$  and

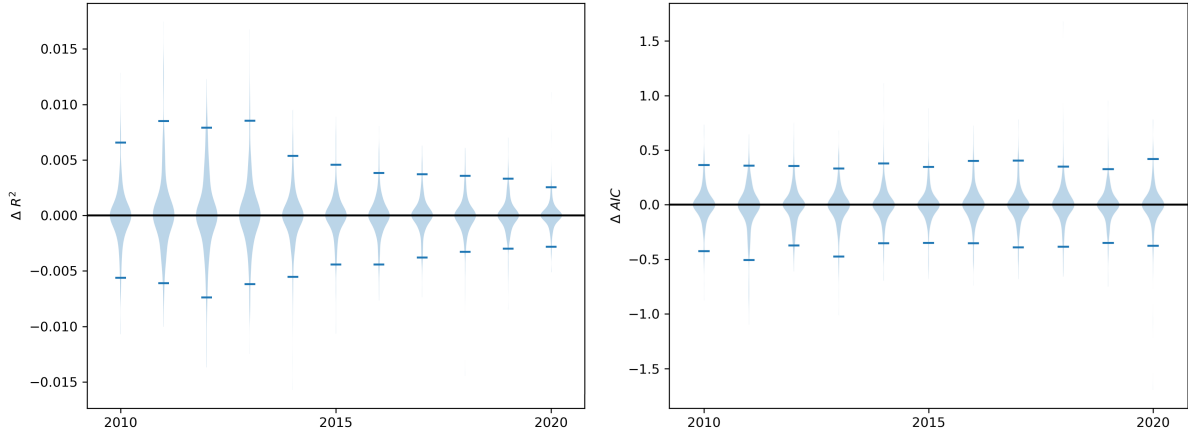

Supplementary Figure 1: The difference in  $R^2$  (left) and  $AIC$  (right) for the two linear regressions  $\ln(b) \sim \ln(k_{inter})$  and  $\ln(b) \sim \ln(k_{inter}/k_{within})$ . Distributions for these differences were computed via n=500 bootstrap resamples with replacement. Horizontal lines show 95% bootstrap confidence intervals.

$\ln(b) \sim \ln(d)$ .

When comparing the  $R^2$  and Akaike information criterion (AIC) across 500 bootstrap resamples, we find no significant advantage for either model (Supplementary Figure 1). The similarity between these two models is due to the fact that, in the absence of segregation or

homophily,  $k_{inter}/k_{within}$  is a monotonic transformation of  $k_{inter}$ . In other words,  $k_{inter}/k_{within}$  and  $k_{inter}$  necessarily are perfectly rank order correlated (i.e.,  $r_s = 1$ ).

In the presence of homophily and segregation the linear regression to predict bias becomes:

$$\ln(b) \sim \ln(d) + \ln(2 - h_1^{bet} - h_2^{bet}) - \ln\left(\left(\frac{N_1}{N}\right)^2(h_1^{in} - h_2^{in}) + (1 - 2\frac{N_1}{N})(1 + h_2^{in})\right) \quad (13)$$

When comparing this model to that used in the main text ( $\ln(b) \sim \ln(d) + \ln(2 - h_1^{bet} - h_2^{bet})$ , population term excluded) we again find no significant advantage for either model. However, there is a clear trend towards the model used in the main text, i.e.,  $\ln(b) \sim \ln(k_{inter})$  having higher adjusted  $R^2$  and lower  $AIC$  (Supplementary Figure 2).

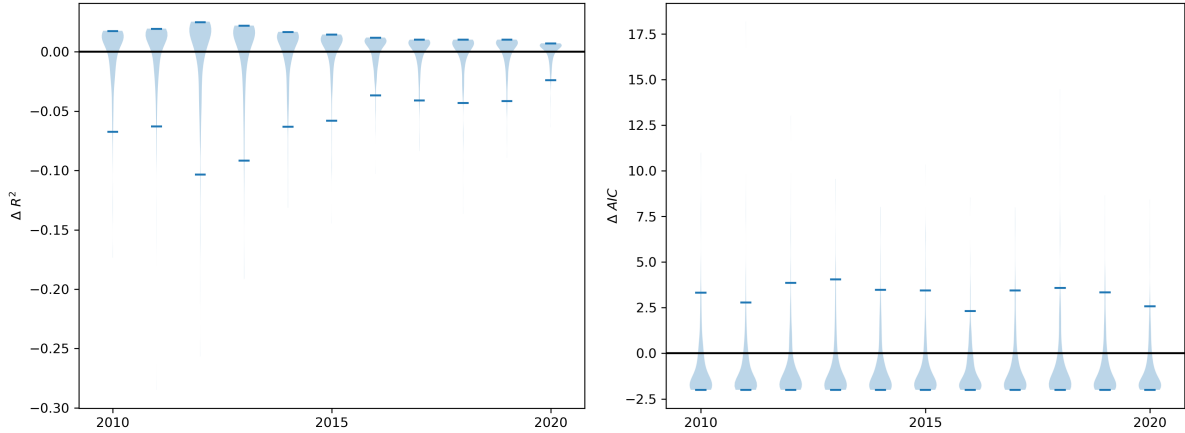

Supplementary Figure 2: The difference in  $R^2$  (left) and  $AIC$  (right) for the two linear regressions  $\ln(b) \sim \ln(k_{inter})$  and  $\ln(b) \sim \ln(k_{inter}/k_{within})$  including segregation and homophily effects. Distributions for these differences were computed via  $n=500$  bootstrap resamples with replacement. Horizontal lines show 95% bootstrap confidence intervals.

## References

- [1] Andrew J. Stier, Sina Sajjadi, Luis M. A. Bettencourt, Fariba Karimi, and Marc G. Berman. Effects of racial segregation on economic productivity in u.s. cities. *arXiv*, 2022.

- [2] Luís MA Bettencourt. The origins of scaling in cities. *Science*, 340(6139):1438–1441, 2013.
- [3] Luís MA Bettencourt. *Introduction to urban science: evidence and theory of cities as complex systems*. MIT Press, 2021.

## Supplementary Figures

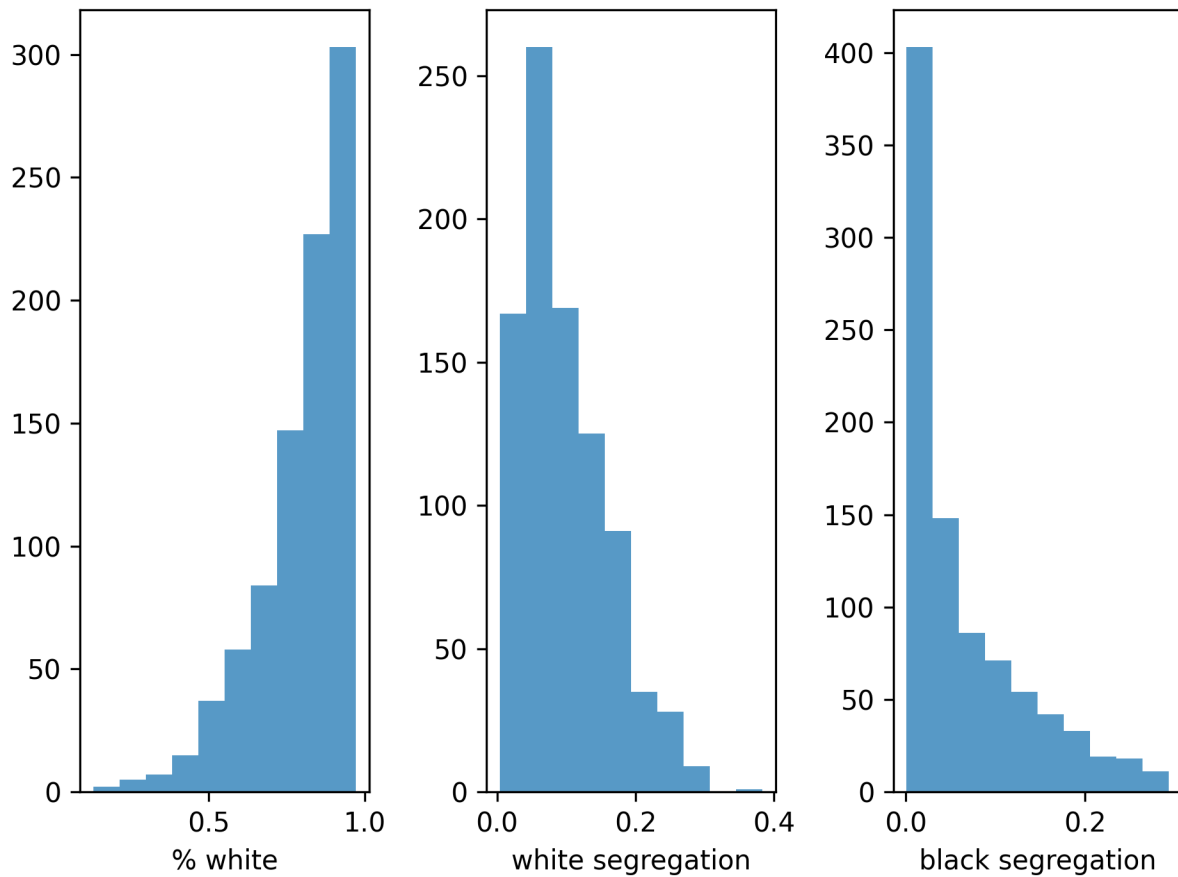

Supplementary Figure 3: Histograms of percent White, White residential racial segregation, and Black residential racial segregation for n=885 CBSAs in 2020. The y-axis denotes the number of cities in a given histogram bin.

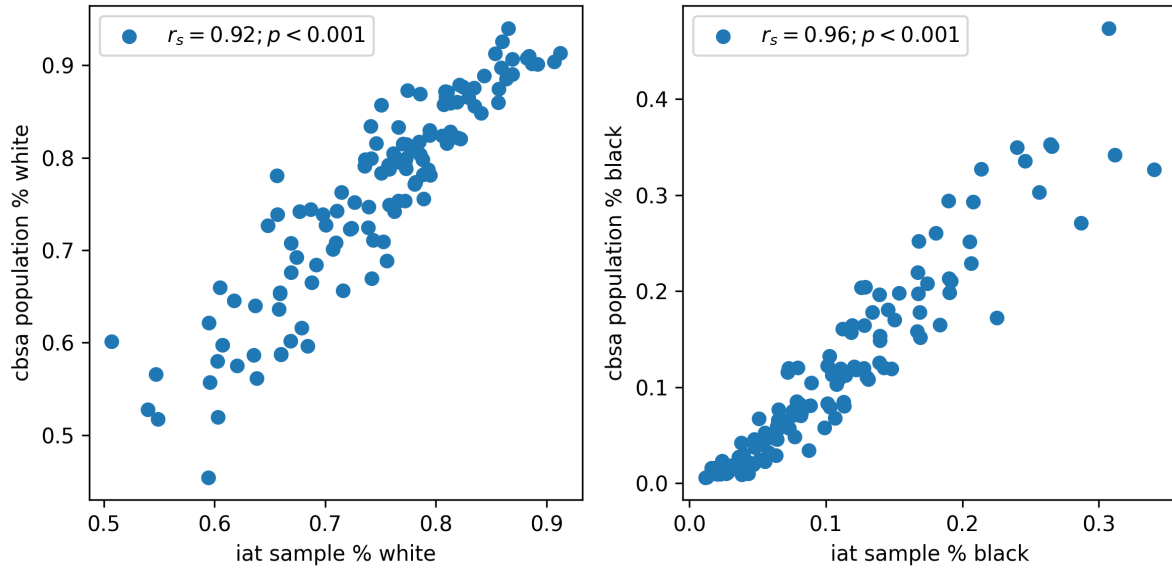

Supplementary Figure 4: Census and IAT Demographics and strongly correlated. Data for  $n=119$  cities in 2020 demonstrates the strong correlation between the fraction of city populations that indicated their race as White or Black in the U.S. census data and the IAT sample data. Note that while the x and y axis scales are similar for the fraction of the population identified as White, the IAT sample has fewer Black respondents than would be expected from a representative sample. Nonetheless, the strong correlations indicate that the IAT sample is suitable for relative, between city analyses.



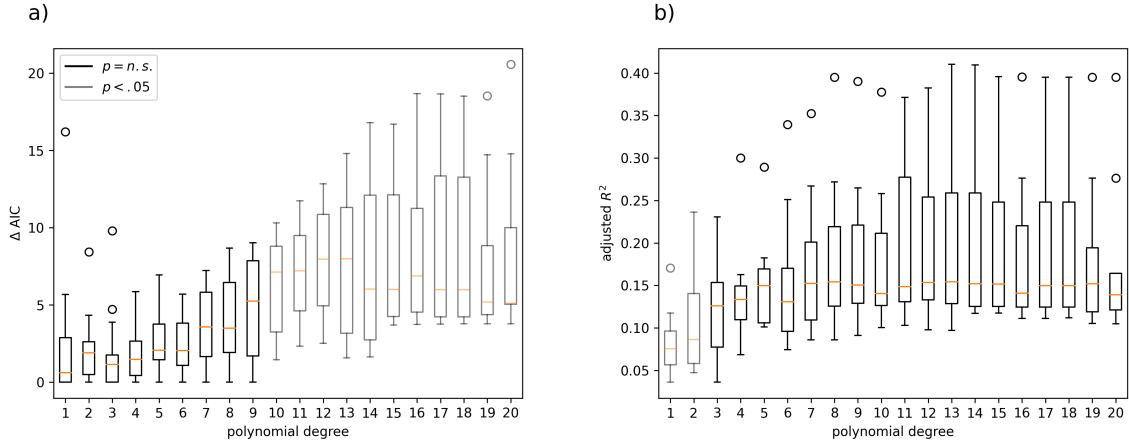

Supplementary Figure 5: Comparison of higher order coupling between  $h^{bet}$  and segregation indices. Statistically, a 4th degree polynomial is the best choice with respect to minimizing overfitting, maximizing variance explained, and having the fewest parameters. A 4th degree polynomial improves the estimated variance explained by the full model with all three effects to an average of 40% (72% of the noise ceiling median lower bound) compared to 35% (63% of the noise ceiling median lower bound) for a linear coupling (degree 1). a) That the model with a 1-degree polynomial, i.e. the linear mode used in the main text has the lowest average delta-AIC. This means that across all years and choices of segregation measure, the linear model is the least overfit model or close to as good as the least overfit model (i.e., the linear model AIC is lowest or slightly larger than the lowest AIC). The distributions of delta-AIC are not significantly different from the linear model until a degree of 10 (solid v.s. transparent). b) The adjusted coefficient of determination ( $R^2$ ) is significantly larger (transparent v.s. solid) for quartic degree and higher polynomials. This difference is on the order of 5% and no further benefit to  $R^2$  is observed for degrees beyond 4. Data for 173 total models are presented with marked medians and error bars representing the  $\pm 1.5$  inter-quartile range. Models are marked as significant based on a two-sided T-test with the degree-1 models.

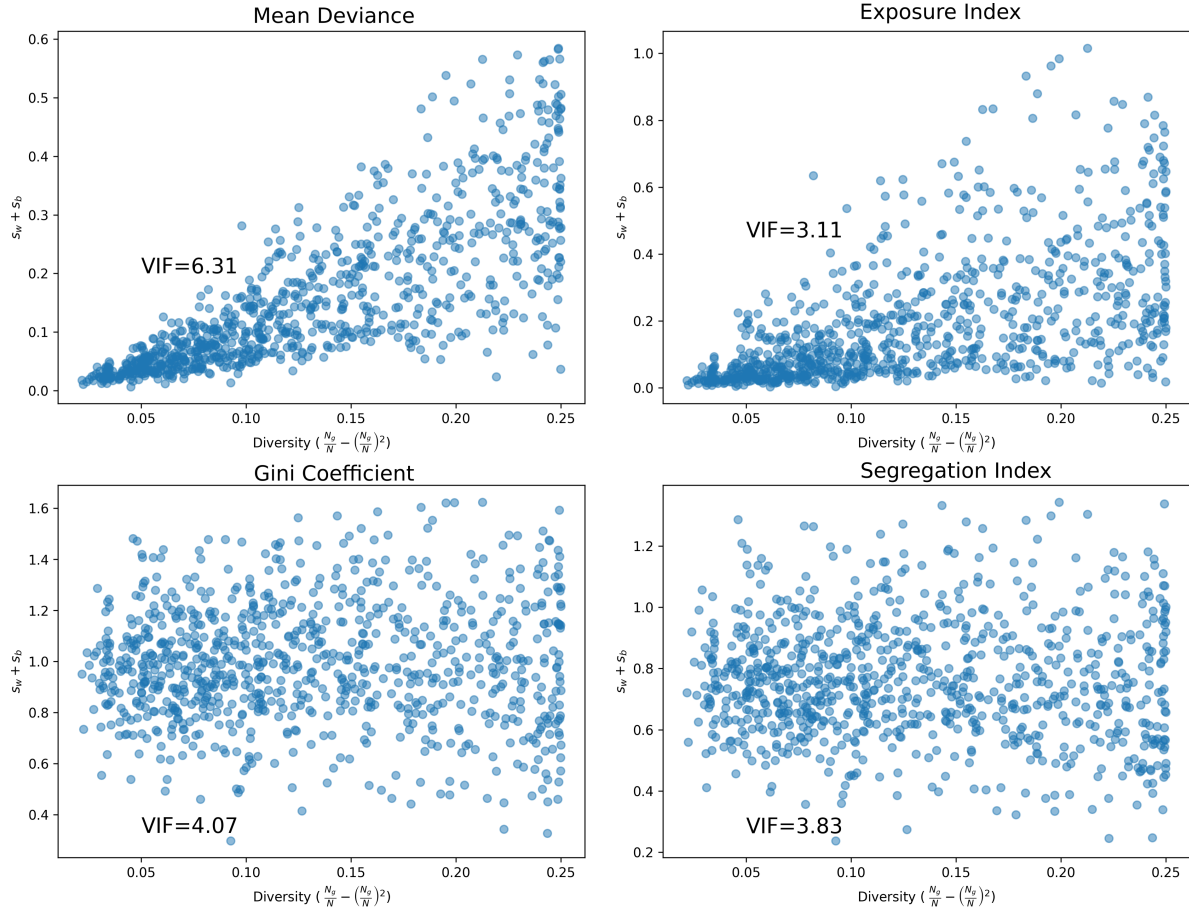

Supplementary Figure 6: Variance Inflation Factors (VIF) between the diversity and segregation term of the model are low for n=885 cities in 2020. Across all segregation measures, with the exception of the mean deviance measure, the estimated VIF is below 5. This indicates that colinearity between the diversity measure and the segregation measures is not high enough to prevent the regression model from estimating separate, independent effects. In other words, diversity and segregation effects are statistically separable even though they are correlated for some pairs of measures.

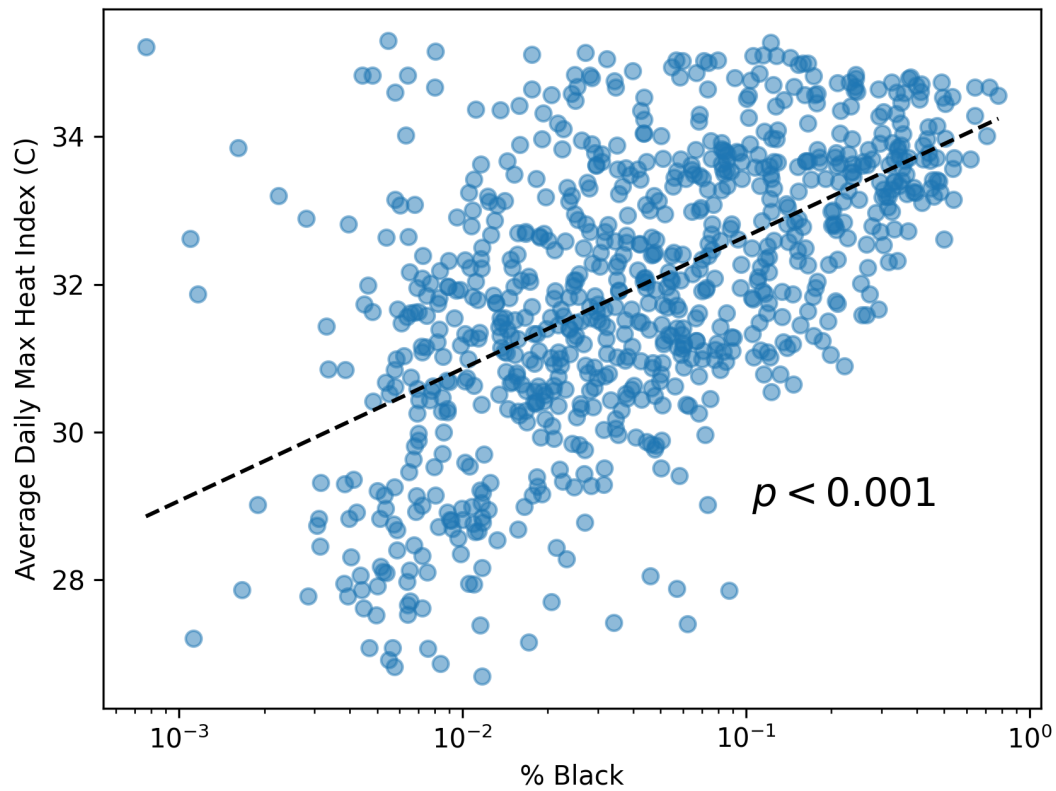

Supplementary Figure 7: Max Heat Index and racial demographics are correlated. Using data from  $n=314$  cities in 2019 we demonstrate that the Average Daily Maximum Heat Index is significantly correlated to the percent of city populations that are Black. Combined with the analyses in Supplementary Tables 15-18, this suggests that the correlation between heat and implicit bias levels is driven by the relationship between heat and diversity, which may, in turn, be due to the historical difference in slavery, crops grown (e.g., cotton), and politics between northern and southern states.

## Supplementary Tables

Supplementary Table 1: Spearman rank order correlations between empirical population fractions and IAT sample fractions across cities. Correlations across cities between e.g., the fraction of the population with race reported as Black in the U.S. census data and the fraction of the city's IAT sample which self reported their race as Black. While the IAT sample is not nationally representative, these correlations suggest that the IAT sample does capture relative demographic differences between cities with respect to race.

| year | $r_s$ (White) | p value | $r_s$ (Black) | p value | # cbsas |
|------|---------------|---------|---------------|---------|---------|
| 2010 | 0.91          | < 0.001 | 0.93          | < 0.001 | 64      |
| 2011 | 0.91          | < 0.001 | 0.94          | < 0.001 | 67      |
| 2012 | 0.92          | < 0.001 | 0.94          | < 0.001 | 67      |
| 2013 | 0.93          | < 0.001 | 0.93          | < 0.001 | 68      |
| 2014 | 0.90          | < 0.001 | 0.93          | < 0.001 | 76      |
| 2015 | 0.90          | < 0.001 | 0.94          | < 0.001 | 85      |
| 2016 | 0.83          | < 0.001 | 0.93          | < 0.001 | 91      |
| 2017 | 0.89          | < 0.001 | 0.95          | < 0.001 | 107     |
| 2018 | 0.90          | < 0.001 | 0.96          | < 0.001 | 111     |
| 2019 | 0.90          | < 0.001 | 0.96          | < 0.001 | 119     |
| 2020 | 0.92          | < 0.001 | 0.96          | < 0.001 | 119     |

Supplementary Table 2: Summary of scaling fits and diversity adjustment and segregation adjustment parameters for cities with more than 500 IAT responses.

| year      | scaling $\beta_1$ | diversity adjustment $\beta_2$ | $s_1 + s_2 \beta_3$ | # cities |
|-----------|-------------------|--------------------------------|---------------------|----------|
| 2010      | [-0.094,-0.021]   | [-0.277,0.038]                 | [-0.563,0.128]      | 64       |
| 2011      | [-0.086,-0.010]   | [-0.296,0.048]                 | [-0.526,0.201]      | 59       |
| 2012      | [-0.080,-0.013]   | [-0.334,-0.078]                | [-0.200,0.315]      | 46       |
| 2013      | [-0.076,-0.019]   | [-0.327,-0.064]                | [-0.174,0.361]      | 52       |
| 2014      | [-0.069,-0.016]   | [-0.221,0.027]                 | [-0.321,0.225]      | 66       |
| 2015      | [-0.047,-0.003]   | [-0.305,-0.130]                | [0.054,0.447]       | 74       |
| 2016      | [-0.055,-0.015]   | [-0.264,-0.095]                | [0.032,0.415]       | 91       |
| 2017      | [-0.059,-0.016]   | [-0.308,-0.128]                | [0.055,0.498]       | 105      |
| 2018      | [-0.061,-0.019]   | [-0.348,-0.158]                | [0.105,0.563]       | 102      |
| 2019      | [-0.063,-0.017]   | [-0.292,-0.094]                | [-0.073,0.409]      | 106      |
| 2020      | [-0.044,-0.011]   | [-0.278,-0.133]                | [0.105,0.466]       | 149      |
| all years | [-0.045,-0.031]   | [-0.226,-0.163]                | [0.026,0.066]       | 914      |

Supplementary Table 3: IAT participants with geographic information

| year | IAT sample size | median CBSA population % |
|------|-----------------|--------------------------|
| 2010 | 163,289         | 0.09%                    |
| 2011 | 149,059         | 0.08%                    |
| 2012 | 118,179         | 0.06%                    |
| 2013 | 125,083         | 0.07%                    |
| 2014 | 171,039         | 0.09%                    |
| 2015 | 208,521         | 0.11%                    |
| 2016 | 273,995         | 0.14%                    |
| 2017 | 321,082         | 0.17%                    |
| 2018 | 316,393         | 0.17%                    |
| 2019 | 321,247         | 0.16%                    |
| 2020 | 584,902         | 0.26%                    |

Supplementary Table 4: Logistic Regression to predict individual racial IAT bias scores  $> 0$  for 2010. Note that larger and less segregated cities are associated with a lower probability of a positive bias towards White faces, in line with Equation 3 of the main text. More diverse cities are significantly related to lower bias levels here.

|                            |             |                          |          |                  |               |               |
|----------------------------|-------------|--------------------------|----------|------------------|---------------|---------------|
| <b>Dep. Variable:</b>      | bias        | <b>No. Observations:</b> | 105199   |                  |               |               |
| <b>Model:</b>              | Logit       | <b>Df Residuals:</b>     | 105189   |                  |               |               |
| <b>Method:</b>             | MLE         | <b>Df Model:</b>         | 9        |                  |               |               |
|                            |             | <b>Pseudo R-squ.:</b>    | 0.08642  |                  |               |               |
|                            |             | <b>Log-Likelihood:</b>   | -52444.  |                  |               |               |
| <b>converged:</b>          | True        | <b>LL-Null:</b>          | -57405.  |                  |               |               |
| <b>Covariance Type:</b>    | nonrobust   | <b>LLR p-value:</b>      | ;0.001   |                  |               |               |
|                            | <b>coef</b> | <b>std err</b>           | <b>z</b> | <b>P&gt;  z </b> | <b>[0.025</b> | <b>0.975]</b> |
| <b>const</b>               | 0.9875      | 1.58e+05                 | 6.25e-06 | 1.000            | -3.1e+05      | 3.1e+05       |
| <b>ln(population)</b>      | -0.0174     | 0.010                    | -1.822   | 0.068            | -0.036        | 0.001         |
| <b>White</b>               | 0.4774      | 0.024                    | 19.738   | < 0.001          | 0.430         | 0.525         |
| <b>Black</b>               | -1.3557     | 0.027                    | -50.526  | < 0.001          | -1.408        | -1.303        |
| <b>Multiracial</b>         | -0.1454     | 0.040                    | -3.664   | < 0.001          | -0.223        | -0.068        |
| <b>High School or Less</b> | 0.2741      | 1.58e+05                 | 1.73e-06 | 1.000            | -3.1e+05      | 3.1e+05       |
| <b>College</b>             | 0.3079      | 1.58e+05                 | 1.95e-06 | 1.000            | -3.1e+05      | 3.1e+05       |
| <b>Advanced Degree</b>     | 0.4055      | 1.58e+05                 | 2.57e-06 | 1.000            | -3.1e+05      | 3.1e+05       |
| <b>Diversity</b>           | 0.0156      | 0.049                    | 0.321    | 0.749            | -0.080        | 0.111         |
| <b>Segregation</b>         | 0.2357      | 0.088                    | 2.685    | 0.007            | 0.064         | 0.408         |

Supplementary Table 5: Logistic Regression to predict individual racial IAT bias scores  $> 0$  for 2011. Note that larger and less segregated cities are associated with a lower probability of a positive bias towards White faces, in line with Equation 3 of the main text. More diverse cities are significantly related to lower bias levels here.

|                         |             |                          |             |                  |               |               |
|-------------------------|-------------|--------------------------|-------------|------------------|---------------|---------------|
| <b>Dep. Variable:</b>   | bias        | <b>No. Observations:</b> | 201378      |                  |               |               |
| <b>Model:</b>           | Logit       | <b>Df Residuals:</b>     | 201369      |                  |               |               |
| <b>Method:</b>          | MLE         | <b>Df Model:</b>         | 8           |                  |               |               |
|                         |             | <b>Pseudo R-squ.:</b>    | 0.08306     |                  |               |               |
|                         |             | <b>Log-Likelihood:</b>   | -1.0053e+05 |                  |               |               |
| <b>converged:</b>       | True        | <b>LL-Null:</b>          | -1.0963e+05 |                  |               |               |
| <b>Covariance Type:</b> | nonrobust   | <b>LLR p-value:</b>      | < 0.001     |                  |               |               |
|                         | <b>coef</b> | <b>std err</b>           | <b>z</b>    | <b>P&gt;  z </b> | <b>[0.025</b> | <b>0.975]</b> |
| <b>const</b>            | 1.2561      | 0.148                    | 8.468       | < 0.001          | 0.965         | 1.547         |
| <b>ln(population)</b>   | -0.0166     | 0.007                    | -2.400      | 0.016            | -0.030        | -0.003        |
| <b>White</b>            | 0.4813      | 0.017                    | 27.860      | < 0.001          | 0.447         | 0.515         |
| <b>Black</b>            | -1.3237     | 0.019                    | -68.833     | < 0.001          | -1.361        | -1.286        |
| <b>Multiracial</b>      | -0.1446     | 0.028                    | -5.095      | < 0.001          | -0.200        | -0.089        |
| <b>College</b>          | 0.0359      | 0.043                    | 0.826       | 0.409            | -0.049        | 0.121         |
| <b>Advanced Degree</b>  | 0.1496      | 0.028                    | 5.382       | < 0.001          | 0.095         | 0.204         |
| <b>Diversity</b>        | 0.0277      | 0.035                    | 0.785       | 0.433            | -0.041        | 0.097         |
| <b>Segregation</b>      | 0.2117      | 0.064                    | 3.332       | 0.001            | 0.087         | 0.336         |

Supplementary Table 6: Logistic Regression to predict individual racial IAT bias scores  $> 0$  for 2012. Note that larger and less segregated cities are associated with a lower probability of a positive bias towards White faces, in line with Equation 3 of the main text. More diverse cities are significantly related to lower bias levels here.

|                         |             |                          |             |                  |               |               |
|-------------------------|-------------|--------------------------|-------------|------------------|---------------|---------------|
| <b>Dep. Variable:</b>   | bias        | <b>No. Observations:</b> | 273788      |                  |               |               |
| <b>Model:</b>           | Logit       | <b>Df Residuals:</b>     | 273779      |                  |               |               |
| <b>Method:</b>          | MLE         | <b>Df Model:</b>         | 8           |                  |               |               |
|                         |             | <b>Pseudo R-squ.:</b>    | 0.08058     |                  |               |               |
|                         |             | <b>Log-Likelihood:</b>   | -1.3665e+05 |                  |               |               |
| <b>converged:</b>       | True        | <b>LL-Null:</b>          | -1.4863e+05 |                  |               |               |
| <b>Covariance Type:</b> | nonrobust   | <b>LLR p-value:</b>      | < 0.001     |                  |               |               |
|                         | <b>coef</b> | <b>std err</b>           | <b>z</b>    | <b>P&gt;  z </b> | <b>[0.025</b> | <b>0.975]</b> |
| <b>const</b>            | 1.1191      | 0.130                    | 8.583       | < 0.001          | 0.864         | 1.375         |
| <b>ln(population)</b>   | -0.0119     | 0.006                    | -1.949      | 0.051            | -0.024        | 6.66e-05      |
| <b>White</b>            | 0.4793      | 0.015                    | 32.648      | < 0.001          | 0.451         | 0.508         |
| <b>Black</b>            | -1.3083     | 0.016                    | -79.633     | < 0.001          | -1.341        | -1.276        |
| <b>Multiracial</b>      | -0.1474     | 0.024                    | -6.080      | < 0.001          | -0.195        | -0.100        |
| <b>College</b>          | 0.0711      | 0.036                    | 1.955       | 0.051            | -0.000        | 0.142         |
| <b>Advanced Degree</b>  | 0.1620      | 0.023                    | 6.983       | < 0.001          | 0.117         | 0.207         |
| <b>Diversity</b>        | 0.0002      | 0.031                    | 0.008       | 0.994            | -0.060        | 0.060         |
| <b>Segregation</b>      | 0.2315      | 0.054                    | 4.260       | < 0.001          | 0.125         | 0.338         |

Supplementary Table 7: Logistic Regression to predict individual racial IAT bias scores  $> 0$  for 2013. Note that larger and less segregated cities are associated with a lower probability of a positive bias towards White faces, in line with Equation 3 of the main text. More diverse cities are significantly related to lower bias levels here.

|                         |             |                          |             |                  |               |               |
|-------------------------|-------------|--------------------------|-------------|------------------|---------------|---------------|
| <b>Dep. Variable:</b>   | bias        | <b>No. Observations:</b> | 354724      |                  |               |               |
| <b>Model:</b>           | Logit       | <b>Df Residuals:</b>     | 354715      |                  |               |               |
| <b>Method:</b>          | MLE         | <b>Df Model:</b>         | 8           |                  |               |               |
|                         |             | <b>Pseudo R-squ.:</b>    | 0.07731     |                  |               |               |
|                         |             | <b>Log-Likelihood:</b>   | -1.7756e+05 |                  |               |               |
| <b>converged:</b>       | True        | <b>LL-Null:</b>          | -1.9243e+05 |                  |               |               |
| <b>Covariance Type:</b> | nonrobust   | <b>LLR p-value:</b>      | < 0.001     |                  |               |               |
|                         | <b>coef</b> | <b>std err</b>           | <b>z</b>    | <b>P&gt;  z </b> | <b>[0.025</b> | <b>0.975]</b> |
| <b>const</b>            | 1.1609      | 0.116                    | 10.022      | < 0.001          | 0.934         | 1.388         |
| <b>ln(population)</b>   | -0.0152     | 0.005                    | -2.825      | 0.005            | -0.026        | -0.005        |
| <b>White</b>            | 0.4653      | 0.013                    | 36.510      | < 0.001          | 0.440         | 0.490         |
| <b>Black</b>            | -1.2982     | 0.014                    | -90.431     | < 0.001          | -1.326        | -1.270        |
| <b>Multiracial</b>      | -0.1634     | 0.021                    | -7.729      | < 0.001          | -0.205        | -0.122        |
| <b>College</b>          | 0.1011      | 0.032                    | 3.181       | 0.001            | 0.039         | 0.163         |
| <b>Advanced Degree</b>  | 0.1783      | 0.020                    | 9.049       | < 0.001          | 0.140         | 0.217         |
| <b>Diversity</b>        | 0.0046      | 0.027                    | 0.167       | 0.867            | -0.049        | 0.058         |
| <b>Segregation</b>      | 0.2390      | 0.048                    | 5.030       | < 0.001          | 0.146         | 0.332         |



Supplementary Table 8: Logistic Regression to predict individual racial IAT bias scores  $> 0$  for 2014. Note that larger and less segregated cities are associated with a lower probability of a positive bias towards White faces, in line with Equation 3 of the main text. More diverse cities are significantly related to lower bias levels here.

|                         |             |                          |             |                  |               |               |
|-------------------------|-------------|--------------------------|-------------|------------------|---------------|---------------|
| <b>Dep. Variable:</b>   | bias        | <b>No. Observations:</b> | 476532      |                  |               |               |
| <b>Model:</b>           | Logit       | <b>Df Residuals:</b>     | 476523      |                  |               |               |
| <b>Method:</b>          | MLE         | <b>Df Model:</b>         | 8           |                  |               |               |
|                         |             | <b>Pseudo R-squ.:</b>    | 0.07018     |                  |               |               |
|                         |             | <b>Log-Likelihood:</b>   | -2.4217e+05 |                  |               |               |
| <b>converged:</b>       | True        | <b>LL-Null:</b>          | -2.6045e+05 |                  |               |               |
| <b>Covariance Type:</b> | nonrobust   | <b>LLR p-value:</b>      | < 0.001     |                  |               |               |
|                         | <b>coef</b> | <b>std err</b>           | <b>z</b>    | <b>P&gt;  z </b> | <b>[0.025</b> | <b>0.975]</b> |
| <b>const</b>            | 1.0019      | 0.097                    | 10.355      | < 0.001          | 0.812         | 1.191         |
| <b>ln(population)</b>   | -0.0128     | 0.005                    | -2.841      | 0.004            | -0.022        | -0.004        |
| <b>White</b>            | 0.4405      | 0.011                    | 40.573      | < 0.001          | 0.419         | 0.462         |
| <b>Black</b>            | -1.2677     | 0.012                    | -101.960    | < 0.001          | -1.292        | -1.243        |
| <b>Multiracial</b>      | -0.1583     | 0.018                    | -8.701      | < 0.001          | -0.194        | -0.123        |
| <b>College</b>          | 0.0879      | 0.026                    | 3.372       | 0.001            | 0.037         | 0.139         |
| <b>Advanced Degree</b>  | 0.1925      | 0.016                    | 12.361      | < 0.001          | 0.162         | 0.223         |
| <b>Diversity</b>        | -0.0346     | 0.023                    | -1.497      | 0.134            | -0.080        | 0.011         |
| <b>Segregation</b>      | 0.2801      | 0.041                    | 6.905       | < 0.001          | 0.201         | 0.360         |

Supplementary Table 9: Logistic Regression to predict individual racial IAT bias scores  $> 0$  for 2015. Note that larger and less segregated cities are associated with a lower probability of a positive bias towards White faces, in line with Equation 3 of the main text. More diverse cities are trending in the direction of less bias, but are not significant here.

|                         |             |                          |             |                  |               |               |
|-------------------------|-------------|--------------------------|-------------|------------------|---------------|---------------|
| <b>Dep. Variable:</b>   | bias        | <b>No. Observations:</b> | 507597      |                  |               |               |
| <b>Model:</b>           | Logit       | <b>Df Residuals:</b>     | 507588      |                  |               |               |
| <b>Method:</b>          | MLE         | <b>Df Model:</b>         | 8           |                  |               |               |
|                         |             | <b>Pseudo R-squ.:</b>    | 0.06866     |                  |               |               |
|                         |             | <b>Log-Likelihood:</b>   | -2.5901e+05 |                  |               |               |
| <b>converged:</b>       | True        | <b>LL-Null:</b>          | -2.7811e+05 |                  |               |               |
| <b>Covariance Type:</b> | nonrobust   | <b>LLR p-value:</b>      | < 0.001     |                  |               |               |
|                         | <b>coef</b> | <b>std err</b>           | <b>z</b>    | <b>P&gt;  z </b> | <b>[0.025</b> | <b>0.975]</b> |
| <b>const</b>            | 0.9372      | 0.093                    | 10.086      | < 0.001          | 0.755         | 1.119         |
| <b>ln(population)</b>   | -0.0115     | 0.004                    | -2.645      | 0.008            | -0.020        | -0.003        |
| <b>White</b>            | 0.4375      | 0.010                    | 41.689      | < 0.001          | 0.417         | 0.458         |
| <b>Black</b>            | -1.2580     | 0.012                    | -104.296    | < 0.001          | -1.282        | -1.234        |
| <b>Multiracial</b>      | -0.1592     | 0.018                    | -9.044      | < 0.001          | -0.194        | -0.125        |
| <b>College</b>          | 0.0931      | 0.025                    | 3.727       | < 0.001          | 0.044         | 0.142         |
| <b>Advanced Degree</b>  | 0.1948      | 0.015                    | 13.103      | < 0.001          | 0.166         | 0.224         |
| <b>Diversity</b>        | -0.0500     | 0.022                    | -2.249      | 0.025            | -0.094        | -0.006        |
| <b>Segregation</b>      | 0.2967      | 0.039                    | 7.588       | < 0.001          | 0.220         | 0.373         |

Supplementary Table 10: Logistic Regression to predict individual racial IAT bias scores  $> 0$  for 2016. Note that larger, more diverse, and less segregated cities are associated with a lower probability of a positive bias towards White faces, in line with Equation 3 of the main text.

|                         |             |                          |          |                  |               |               |
|-------------------------|-------------|--------------------------|----------|------------------|---------------|---------------|
| <b>Dep. Variable:</b>   | bias        | <b>No. Observations:</b> | 77997    |                  |               |               |
| <b>Model:</b>           | Logit       | <b>Df Residuals:</b>     | 77987    |                  |               |               |
| <b>Method:</b>          | MLE         | <b>Df Model:</b>         | 9        |                  |               |               |
|                         |             | <b>Pseudo R-squ.:</b>    | 0.05309  |                  |               |               |
|                         |             | <b>Log-Likelihood:</b>   | -39891.  |                  |               |               |
| <b>converged:</b>       | True        | <b>LL-Null:</b>          | -42128.  |                  |               |               |
| <b>Covariance Type:</b> | nonrobust   | <b>LLR p-value:</b>      | < 0.001  |                  |               |               |
|                         | <b>coef</b> | <b>std err</b>           | <b>z</b> | <b>P&gt;  z </b> | <b>[0.025</b> | <b>0.975]</b> |
| <b>const</b>            | 0.9807      | 0.201                    | 4.869    | < 0.001          | 0.586         | 1.376         |
| <b>ln(population)</b>   | -0.0393     | 0.010                    | -3.998   | < 0.001          | -0.059        | -0.020        |
| <b>White</b>            | 0.4230      | 0.028                    | 15.053   | < 0.001          | 0.368         | 0.478         |
| <b>Black</b>            | -1.0896     | 0.033                    | -33.337  | < 0.001          | -1.154        | -1.026        |
| <b>Multiracial</b>      | -0.3113     | 0.042                    | -7.336   | < 0.001          | -0.395        | -0.228        |
| <b>Birth Sex</b>        | 0.1156      | 0.018                    | 6.333    | < 0.001          | 0.080         | 0.151         |
| <b>College</b>          | 0.2359      | 0.053                    | 4.415    | < 0.001          | 0.131         | 0.341         |
| <b>Advanced Degree</b>  | 0.2346      | 0.034                    | 6.991    | < 0.001          | 0.169         | 0.300         |
| <b>Diversity</b>        | -0.1352     | 0.053                    | -2.546   | 0.011            | -0.239        | -0.031        |
| <b>Segregation</b>      | 0.7152      | 0.102                    | 7.035    | < 0.001          | 0.516         | 0.914         |

Supplementary Table 11: Logistic Regression to predict individual racial IAT bias scores  $> 0$  for 2017. Note that larger, more diverse, and less segregated cities are associated with a lower probability of a positive bias towards White faces, in line with Equation 3 of the main text.

|                            |             |                          |             |                  |               |               |
|----------------------------|-------------|--------------------------|-------------|------------------|---------------|---------------|
| <b>Dep. Variable:</b>      | bias        | <b>No. Observations:</b> | 323355      |                  |               |               |
| <b>Model:</b>              | Logit       | <b>Df Residuals:</b>     | 323344      |                  |               |               |
| <b>Method:</b>             | MLE         | <b>Df Model:</b>         | 10          |                  |               |               |
|                            |             | <b>Pseudo R-squ.:</b>    | 0.04993     |                  |               |               |
|                            |             | <b>Log-Likelihood:</b>   | -1.6958e+05 |                  |               |               |
| <b>converged:</b>          | True        | <b>LL-Null:</b>          | -1.7849e+05 |                  |               |               |
| <b>Covariance Type:</b>    | nonrobust   | <b>LLR p-value:</b>      | < 0.001     |                  |               |               |
|                            | <b>coef</b> | <b>std err</b>           | <b>z</b>    | <b>P&gt;  z </b> | <b>[0.025</b> | <b>0.975]</b> |
| <b>const</b>               | 0.5926      | 1.01e+05                 | 5.85e-06    | 1.000            | -1.99e+05     | 1.99e+05      |
| <b>ln(population)</b>      | -0.0192     | 0.005                    | -3.939      | < 0.001          | -0.029        | -0.010        |
| <b>White</b>               | 0.3823      | 0.014                    | 28.240      | < 0.001          | 0.356         | 0.409         |
| <b>Black</b>               | -1.1001     | 0.016                    | -68.881     | < 0.001          | -1.131        | -1.069        |
| <b>Multiracial</b>         | -0.3696     | 0.020                    | -18.407     | < 0.001          | -0.409        | -0.330        |
| <b>Birth Sex</b>           | 0.1474      | 0.009                    | 16.623      | < 0.001          | 0.130         | 0.165         |
| <b>High School or Less</b> | 0.1030      | 1.01e+05                 | 1.02e-06    | 1.000            | -1.99e+05     | 1.99e+05      |
| <b>College</b>             | 0.2474      | 1.01e+05                 | 2.44e-06    | 1.000            | -1.99e+05     | 1.99e+05      |
| <b>Advanced Degree</b>     | 0.2422      | 1.01e+05                 | 2.39e-06    | 1.000            | -1.99e+05     | 1.99e+05      |
| <b>Diversity</b>           | -0.1736     | 0.026                    | -6.714      | < 0.001          | -0.224        | -0.123        |
| <b>Segregation</b>         | 0.6174      | 0.049                    | 12.702      | < 0.001          | 0.522         | 0.713         |

Supplementary Table 12: Logistic Regression to predict individual racial IAT bias scores  $> 0$  for 2018. Note that larger, more diverse, and less segregated cities are associated with a lower probability of a positive bias towards White faces, in line with Equation 3 of the main text.

|                         |             |                          |             |                  |               |               |
|-------------------------|-------------|--------------------------|-------------|------------------|---------------|---------------|
| <b>Dep. Variable:</b>   | bias        | <b>No. Observations:</b> | 563503      |                  |               |               |
| <b>Model:</b>           | Logit       | <b>Df Residuals:</b>     | 563493      |                  |               |               |
| <b>Method:</b>          | MLE         | <b>Df Model:</b>         | 9           |                  |               |               |
|                         |             | <b>Pseudo R-squ.:</b>    | 0.05051     |                  |               |               |
|                         |             | <b>Log-Likelihood:</b>   | -2.9968e+05 |                  |               |               |
| <b>converged:</b>       | True        | <b>LL-Null:</b>          | -3.1562e+05 |                  |               |               |
| <b>Covariance Type:</b> | nonrobust   | <b>LLR p-value:</b>      | < 0.001     |                  |               |               |
|                         | <b>coef</b> | <b>std err</b>           | <b>z</b>    | <b>P&gt;  z </b> | <b>[0.025</b> | <b>0.975]</b> |
| <b>const</b>            | 0.4491      | 0.078                    | 5.763       | < 0.001          | 0.296         | 0.602         |
| <b>ln(population)</b>   | -0.0114     | 0.004                    | -3.084      | 0.002            | -0.019        | -0.004        |
| <b>White</b>            | 0.4094      | 0.010                    | 40.820      | < 0.001          | 0.390         | 0.429         |
| <b>Black</b>            | -1.0722     | 0.012                    | -90.542     | < 0.001          | -1.095        | -1.049        |
| <b>Multiracial</b>      | -0.3338     | 0.015                    | -22.260     | < 0.001          | -0.363        | -0.304        |
| <b>Birth Sex</b>        | 0.1422      | 0.007                    | 21.292      | < 0.001          | 0.129         | 0.155         |
| <b>College</b>          | 0.1656      | 0.020                    | 8.453       | < 0.001          | 0.127         | 0.204         |
| <b>Advanced Degree</b>  | 0.1413      | 0.013                    | 10.887      | < 0.001          | 0.116         | 0.167         |
| <b>Diversity</b>        | -0.2113     | 0.020                    | -10.807     | < 0.001          | -0.250        | -0.173        |
| <b>Segregation</b>      | 0.6475      | 0.036                    | 17.748      | < 0.001          | 0.576         | 0.719         |

Supplementary Table 13: Logistic Regression to predict individual racial IAT bias scores  $> 0$  for 2019. Note that larger, more diverse, and less segregated cities are associated with a lower probability of a positive bias towards White faces, in line with Equation 3 of the main text.

|                         |             |                          |             |                  |               |               |
|-------------------------|-------------|--------------------------|-------------|------------------|---------------|---------------|
| <b>Dep. Variable:</b>   | bias        | <b>No. Observations:</b> | 806039      |                  |               |               |
| <b>Model:</b>           | Logit       | <b>Df Residuals:</b>     | 806029      |                  |               |               |
| <b>Method:</b>          | MLE         | <b>Df Model:</b>         | 9           |                  |               |               |
|                         |             | <b>Pseudo R-squ.:</b>    | 0.05142     |                  |               |               |
|                         |             | <b>Log-Likelihood:</b>   | -4.3181e+05 |                  |               |               |
| <b>converged:</b>       | True        | <b>LL-Null:</b>          | -4.5522e+05 |                  |               |               |
| <b>Covariance Type:</b> | nonrobust   | <b>LLR p-value:</b>      | < 0.001     |                  |               |               |
|                         | <b>coef</b> | <b>std err</b>           | <b>z</b>    | <b>P&gt;  z </b> | <b>[0.025</b> | <b>0.975]</b> |
| <b>const</b>            | 0.4082      | 0.066                    | 6.228       | < 0.001          | 0.280         | 0.537         |
| <b>ln(population)</b>   | -0.0076     | 0.003                    | -2.456      | 0.014            | -0.014        | -0.002        |
| <b>White</b>            | 0.4021      | 0.008                    | 48.239      | < 0.001          | 0.386         | 0.418         |
| <b>Black</b>            | -1.0854     | 0.010                    | -110.636    | < 0.001          | -1.105        | -1.066        |
| <b>Multiracial</b>      | -0.3431     | 0.012                    | -27.498     | < 0.001          | -0.368        | -0.319        |
| <b>Birth Sex</b>        | 0.1403      | 0.006                    | 25.204      | < 0.001          | 0.129         | 0.151         |
| <b>College</b>          | 0.1665      | 0.016                    | 10.187      | < 0.001          | 0.134         | 0.199         |
| <b>Advanced Degree</b>  | 0.1366      | 0.011                    | 12.565      | < 0.001          | 0.115         | 0.158         |
| <b>Diversity</b>        | -0.2049     | 0.016                    | -12.462     | < 0.001          | -0.237        | -0.173        |
| <b>Segregation</b>      | 0.6221      | 0.030                    | 20.489      | < 0.001          | 0.563         | 0.682         |

Supplementary Table 14: Logistic Regression to predict individual racial IAT bias scores  $> 0$  for 2020. Note that larger, more diverse, and less segregated cities are associated with a lower probability of a positive bias towards White faces, in line with Equation 3 of the main text.

|                            |             |                          |             |                  |               |               |
|----------------------------|-------------|--------------------------|-------------|------------------|---------------|---------------|
| <b>Dep. Variable:</b>      | bias        | <b>No. Observations:</b> | 1288524     |                  |               |               |
| <b>Model:</b>              | Logit       | <b>Df Residuals:</b>     | 1288513     |                  |               |               |
| <b>Method:</b>             | MLE         | <b>Df Model:</b>         | 10          |                  |               |               |
|                            |             | <b>Pseudo R-squ.:</b>    | 0.04360     |                  |               |               |
|                            |             | <b>Log-Likelihood:</b>   | -7.0843e+05 |                  |               |               |
| <b>converged:</b>          | True        | <b>LL-Null:</b>          | -7.4073e+05 |                  |               |               |
| <b>Covariance Type:</b>    | nonrobust   | <b>LLR p-value:</b>      | < 0.001     |                  |               |               |
|                            | <b>coef</b> | <b>std err</b>           | <b>z</b>    | <b>P&gt;  z </b> | <b>[0.025</b> | <b>0.975]</b> |
| <b>const</b>               | 0.2294      | 8.49e+04                 | 2.7e-06     | 1.000            | -1.66e+05     | 1.66e+05      |
| <b>ln(population)</b>      | -0.0029     | 0.002                    | -1.224      | 0.221            | -0.008        | 0.002         |
| <b>White</b>               | 0.3728      | 0.007                    | 56.424      | < 0.001          | 0.360         | 0.386         |
| <b>Black</b>               | -1.0520     | 0.008                    | -132.237    | < 0.001          | -1.068        | -1.036        |
| <b>Multiracial</b>         | -0.3331     | 0.010                    | -33.042     | < 0.001          | -0.353        | -0.313        |
| <b>Birth Sex</b>           | -0.2015     | 0.111                    | -1.814      | 0.070            | -0.419        | 0.016         |
| <b>High School or Less</b> | -0.0027     | 8.49e+04                 | -3.24e-08   | 1.000            | -1.66e+05     | 1.66e+05      |
| <b>College</b>             | 0.1431      | 8.49e+04                 | 1.69e-06    | 1.000            | -1.66e+05     | 1.66e+05      |
| <b>Advanced Degree</b>     | 0.0890      | 8.49e+04                 | 1.05e-06    | 1.000            | -1.66e+05     | 1.66e+05      |
| <b>Diversity</b>           | -0.2715     | 0.013                    | -21.141     | < 0.001          | -0.297        | -0.246        |
| <b>Segregation</b>         | 0.7195      | 0.024                    | 30.540      | < 0.001          | 0.673         | 0.766         |

Supplementary Table 15: Comparison of Models for cities that have available Area Deprivation Index (ADI) and Heat Index (HI) data. All models include city size, diversity and segregation effects (mean deviation segregation measure).

|  | year | no ADI $R^2$ | ADI $R^2$ | ADI n | no HI $R^2$ | HI $R^2$ | HI n |
|--|------|--------------|-----------|-------|-------------|----------|------|
|  | 2010 | 0.383        | 0.394     | 36    | 0.329       | 0.357    | 18   |
|  | 2011 | 0.290        | 0.291     | 34    | 0.258       | 0.265    | 17   |
|  | 2012 | 0.370        | 0.389     | 27    | 0.463       | 0.478    | 17   |
|  | 2013 | 0.346        | 0.347     | 32    | 0.417       | 0.418    | 17   |
|  | 2014 | 0.248        | 0.259     | 39    | 0.368       | 0.448    | 18   |
|  | 2015 | 0.212        | 0.215     | 42    | 0.518       | 0.579    | 18   |
|  | 2016 | 0.150        | 0.162     | 50    | 0.502       | 0.546    | 19   |
|  | 2017 | 0.145        | 0.145     | 54    | 0.381       | 0.381    | 20   |
|  | 2018 | 0.204        | 0.222     | 53    | 0.468       | 0.496    | 19   |
|  | 2019 | 0.202        | 0.215     | 58    | 0.416       | 0.431    | 20   |
|  | 2020 | 0.160        | 0.161     | 76    | 0.437       | 0.438    | 22   |

Supplementary Table 16: Comparison of Models for cities that have available Area Deprivation Index (ADI) and Heat Index (HI) data. All models include city size, diversity, and segregation effects (segregation index).

| year | no ADI $R^2$ | ADI $R^2$ | ADI n | no HI $R^2$ | HI $R^2$ | HI n |
|------|--------------|-----------|-------|-------------|----------|------|
| 2010 | 0.399        | 0.412     | 36    | 0.376       | 0.397    | 18   |
| 2011 | 0.318        | 0.318     | 34    | 0.256       | 0.262    | 17   |
| 2012 | 0.418        | 0.438     | 27    | 0.517       | 0.527    | 17   |
| 2013 | 0.414        | 0.414     | 32    | 0.508       | 0.508    | 17   |
| 2014 | 0.289        | 0.300     | 39    | 0.445       | 0.516    | 18   |
| 2015 | 0.332        | 0.334     | 42    | 0.585       | 0.616    | 18   |
| 2016 | 0.213        | 0.231     | 50    | 0.639       | 0.662    | 19   |
| 2017 | 0.193        | 0.193     | 54    | 0.559       | 0.562    | 20   |
| 2018 | 0.273        | 0.293     | 53    | 0.671       | 0.690    | 19   |
| 2019 | 0.293        | 0.310     | 58    | 0.656       | 0.664    | 20   |
| 2020 | 0.288        | 0.288     | 76    | 0.650       | 0.650    | 22   |

Supplementary Table 17: Comparison of Models for cities that have available Area Deprivation Index (ADI) and Heat Index (HI) data. All models include city size, diversity and segregation effects (gini coefficient).

| year | no ADI $R^2$ | ADI $R^2$ | ADI n | no HI $R^2$ | HI $R^2$ | HI n |
|------|--------------|-----------|-------|-------------|----------|------|
| 2010 | 0.401        | 0.416     | 36    | 0.366       | 0.388    | 18   |
| 2011 | 0.327        | 0.327     | 34    | 0.257       | 0.263    | 17   |
| 2012 | 0.424        | 0.448     | 27    | 0.518       | 0.529    | 17   |
| 2013 | 0.414        | 0.415     | 32    | 0.502       | 0.502    | 17   |
| 2014 | 0.291        | 0.300     | 39    | 0.442       | 0.517    | 18   |
| 2015 | 0.333        | 0.338     | 42    | 0.581       | 0.617    | 18   |
| 2016 | 0.223        | 0.239     | 50    | 0.633       | 0.660    | 19   |
| 2017 | 0.197        | 0.197     | 54    | 0.568       | 0.569    | 20   |
| 2018 | 0.271        | 0.288     | 53    | 0.665       | 0.686    | 19   |
| 2019 | 0.296        | 0.310     | 58    | 0.648       | 0.658    | 20   |
| 2020 | 0.296        | 0.296     | 76    | 0.651       | 0.652    | 22   |



Supplementary Table 18: Comparison of Models for cities that have available Area Deprivation Index (ADI) and Heat Index (HI) data. All models include city size, diversity and segregation effects ( $\eta^2$ ).

| year | no ADI $R^2$ | ADI $R^2$ | ADI n | no HI $R^2$ | HI $R^2$ | HI n |
|------|--------------|-----------|-------|-------------|----------|------|
| 2010 | 0.394        | 0.406     | 36    | 0.365       | 0.387    | 18   |
| 2011 | 0.310        | 0.310     | 34    | 0.252       | 0.259    | 17   |
| 2012 | 0.410        | 0.429     | 27    | 0.505       | 0.515    | 17   |
| 2013 | 0.406        | 0.406     | 32    | 0.490       | 0.490    | 17   |
| 2014 | 0.289        | 0.300     | 39    | 0.426       | 0.498    | 18   |
| 2015 | 0.293        | 0.296     | 42    | 0.589       | 0.623    | 18   |
| 2016 | 0.187        | 0.202     | 50    | 0.582       | 0.609    | 19   |
| 2017 | 0.178        | 0.179     | 54    | 0.494       | 0.497    | 20   |
| 2018 | 0.246        | 0.265     | 53    | 0.575       | 0.590    | 19   |
| 2019 | 0.258        | 0.270     | 58    | 0.556       | 0.561    | 20   |
| 2020 | 0.225        | 0.225     | 76    | 0.561       | 0.563    | 22   |

Supplementary Table 19: Summary of scaling fits and diversity adjustment and segregation adjustment variance explained for cities with more than 250 IAT responses.

| year      | scaling $R^2$ | diversity<br>adjustment $R^2$ | adjust-<br>segregation<br>adjustment $R^2$ | overall $R^2$ | # cities |
|-----------|---------------|-------------------------------|--------------------------------------------|---------------|----------|
| 2010      | 0.125         | 0.128                         | -0.007                                     | 0.255         | 126      |
| 2011      | 0.056         | 0.120                         | -0.005                                     | 0.188         | 119      |
| 2012      | 0.165         | 0.047                         | -0.008                                     | 0.225         | 88       |
| 2013      | 0.134         | 0.091                         | -0.008                                     | 0.232         | 98       |
| 2014      | 0.097         | 0.066                         | -0.008                                     | 0.172         | 116      |
| 2015      | 0.044         | 0.158                         | -0.004                                     | 0.211         | 129      |
| 2016      | 0.078         | 0.145                         | 0.021                                      | 0.246         | 148      |
| 2017      | 0.079         | 0.132                         | 0.015                                      | 0.232         | 163      |
| 2018      | 0.143         | 0.131                         | 0.061                                      | 0.323         | 157      |
| 2019      | 0.054         | 0.168                         | 0.008                                      | 0.236         | 174      |
| 2020      | 0.046         | 0.059                         | 0.040                                      | 0.150         | 228      |
| all years | 0.086         | 0.117                         | 0.003                                      | 0.205         | 1546     |

Supplementary Table 20: Summary of scaling fits and diversity adjustment and segregation adjustment variance explained for cities with more than 1000 IAT responses.

| year      | scaling $R^2$ | diversity<br>ment $R^2$ | adjust-<br>justment $R^2$ | segregation ad-<br>justment $R^2$ | overall $R^2$ | # cities |
|-----------|---------------|-------------------------|---------------------------|-----------------------------------|---------------|----------|
| 2010      | 0.053         | 0.143                   |                           | -0.022                            | 0.239         | 31       |
| 2011      | 0.112         | 0.145                   |                           | -0.030                            | 0.284         | 31       |
| 2012      | 0.047         | 0.082                   |                           | -0.019                            | 0.195         | 26       |
| 2013      | 0.052         | 0.195                   |                           | 0.016                             | 0.319         | 28       |
| 2014      | 0.039         | 0.262                   |                           | 0.036                             | 0.371         | 34       |
| 2015      | 0.014         | 0.340                   |                           | 0.055                             | 0.436         | 43       |
| 2016      | 0.115         | 0.227                   |                           | 0.022                             | 0.369         | 57       |
| 2017      | 0.071         | 0.207                   |                           | 0.045                             | 0.339         | 61       |
| 2018      | 0.090         | 0.210                   |                           | 0.022                             | 0.337         | 59       |
| 2019      | 0.054         | 0.169                   |                           | -0.002                            | 0.248         | 61       |
| 2020      | 0.041         | 0.147                   |                           | 0.094                             | 0.292         | 89       |
| all years | 0.076         | 0.201                   |                           | 0.026                             | 0.298         | 520      |

Supplementary Table 21: Summary of scaling fits and diversity adjustment and segregation adjustment variance explained from the  $\eta^2$  measure for cities with more than 250 IAT responses.

| year      | scaling $R^2$ | diversity<br>ment $R^2$ | adjust-<br>justment $R^2$ | segregation ad-<br>justment $R^2$ | overall $R^2$ | # cities |
|-----------|---------------|-------------------------|---------------------------|-----------------------------------|---------------|----------|
| 2010      | 0.125         | 0.128                   |                           | 0.010                             | 0.265         | 126      |
| 2011      | 0.056         | 0.120                   |                           | 0.012                             | 0.199         | 119      |
| 2012      | 0.165         | 0.047                   |                           | 0.002                             | 0.228         | 88       |
| 2013      | 0.134         | 0.091                   |                           | 0.035                             | 0.263         | 98       |
| 2014      | 0.097         | 0.066                   |                           | 0.004                             | 0.180         | 116      |
| 2015      | 0.044         | 0.158                   |                           | 0.033                             | 0.243         | 129      |
| 2016      | 0.078         | 0.145                   |                           | 0.050                             | 0.270         | 148      |
| 2017      | 0.079         | 0.132                   |                           | 0.071                             | 0.278         | 163      |
| 2018      | 0.143         | 0.131                   |                           | 0.118                             | 0.368         | 157      |
| 2019      | 0.054         | 0.168                   |                           | 0.052                             | 0.274         | 174      |
| 2020      | 0.046         | 0.059                   |                           | 0.094                             | 0.199         | 228      |
| all years | 0.086         | 0.117                   |                           | 0.036                             | 0.231         | 1546     |

Supplementary Table 22: Summary of scaling fits and diversity adjustment and segregation adjustment variance explained from the  $\eta^2$  measure for cities with more than 1000 IAT responses.

| year      | scaling $R^2$ | diversity<br>adjustment $R^2$ | adjust-<br>segregation ad-<br>justment $R^2$ | overall $R^2$ | # cities |
|-----------|---------------|-------------------------------|----------------------------------------------|---------------|----------|
| 2010      | 0.053         | 0.143                         | 0.024                                        | 0.276         | 31       |
| 2011      | 0.112         | 0.145                         | -0.008                                       | 0.299         | 31       |
| 2012      | 0.047         | 0.082                         | 0.069                                        | 0.269         | 26       |
| 2013      | 0.052         | 0.195                         | 0.115                                        | 0.401         | 28       |
| 2014      | 0.039         | 0.262                         | 0.085                                        | 0.413         | 34       |
| 2015      | 0.014         | 0.340                         | 0.126                                        | 0.501         | 43       |
| 2016      | 0.115         | 0.227                         | 0.104                                        | 0.434         | 57       |
| 2017      | 0.071         | 0.207                         | 0.125                                        | 0.407         | 61       |
| 2018      | 0.090         | 0.210                         | 0.091                                        | 0.393         | 59       |
| 2019      | 0.054         | 0.169                         | 0.065                                        | 0.306         | 61       |
| 2020      | 0.041         | 0.147                         | 0.167                                        | 0.358         | 89       |
| all years | 0.076         | 0.201                         | 0.088                                        | 0.351         | 520      |

Supplementary Table 23: Summary of scaling fits and diversity adjustment and segregation adjustment variance explained from the segregation index for cities with more than 250 IAT responses.

| year      | scaling $R^2$ | diversity<br>adjustment $R^2$ | adjust-<br>segregation ad-<br>justment $R^2$ | overall $R^2$ | # cities |
|-----------|---------------|-------------------------------|----------------------------------------------|---------------|----------|
| 2010      | 0.125         | 0.128                         | 0.023                                        | 0.274         | 126      |
| 2011      | 0.056         | 0.120                         | 0.024                                        | 0.210         | 119      |
| 2012      | 0.165         | 0.047                         | 0.006                                        | 0.231         | 88       |
| 2013      | 0.134         | 0.091                         | 0.053                                        | 0.277         | 98       |
| 2014      | 0.097         | 0.066                         | 0.009                                        | 0.183         | 116      |
| 2015      | 0.044         | 0.158                         | 0.045                                        | 0.253         | 129      |
| 2016      | 0.078         | 0.145                         | 0.092                                        | 0.307         | 148      |
| 2017      | 0.079         | 0.132                         | 0.085                                        | 0.290         | 163      |
| 2018      | 0.143         | 0.131                         | 0.137                                        | 0.382         | 157      |
| 2019      | 0.054         | 0.168                         | 0.103                                        | 0.320         | 174      |
| 2020      | 0.046         | 0.059                         | 0.148                                        | 0.250         | 228      |
| all years | 0.086         | 0.117                         | 0.064                                        | 0.255         | 1546     |

Supplementary Table 24: Summary of scaling fits and diversity adjustment and segregation adjustment variance explained from the segregation index for cities with more than 1000 IAT responses.

| year      | scaling $R^2$ | diversity<br>adjustment $R^2$ | adjust-<br>segregation ad-<br>justment $R^2$ | overall $R^2$ | # cities |
|-----------|---------------|-------------------------------|----------------------------------------------|---------------|----------|
| 2010      | 0.053         | 0.143                         | 0.040                                        | 0.288         | 31       |
| 2011      | 0.112         | 0.145                         | 0.004                                        | 0.307         | 31       |
| 2012      | 0.047         | 0.082                         | 0.121                                        | 0.312         | 26       |
| 2013      | 0.052         | 0.195                         | 0.136                                        | 0.418         | 28       |
| 2014      | 0.039         | 0.262                         | 0.079                                        | 0.408         | 34       |
| 2015      | 0.014         | 0.340                         | 0.134                                        | 0.508         | 43       |
| 2016      | 0.115         | 0.227                         | 0.113                                        | 0.441         | 57       |
| 2017      | 0.071         | 0.207                         | 0.134                                        | 0.414         | 61       |
| 2018      | 0.090         | 0.210                         | 0.092                                        | 0.395         | 59       |
| 2019      | 0.054         | 0.169                         | 0.085                                        | 0.324         | 61       |
| 2020      | 0.041         | 0.147                         | 0.195                                        | 0.383         | 89       |
| all years | 0.076         | 0.201                         | 0.111                                        | 0.372         | 520      |

Supplementary Table 25: Summary of scaling fits and diversity adjustment and segregation adjustment variance explained from the gini coefficient for cities with more than 250 IAT responses.

| year      | scaling $R^2$ | diversity<br>adjustment $R^2$ | adjust-<br>segregation ad-<br>justment $R^2$ | overall $R^2$ | # cities |
|-----------|---------------|-------------------------------|----------------------------------------------|---------------|----------|
| 2010      | 0.125         | 0.128                         | 0.031                                        | 0.281         | 126      |
| 2011      | 0.056         | 0.120                         | 0.027                                        | 0.212         | 119      |
| 2012      | 0.165         | 0.047                         | 0.007                                        | 0.231         | 88       |
| 2013      | 0.134         | 0.091                         | 0.059                                        | 0.282         | 98       |
| 2014      | 0.097         | 0.066                         | 0.009                                        | 0.184         | 116      |
| 2015      | 0.044         | 0.158                         | 0.050                                        | 0.258         | 129      |
| 2016      | 0.078         | 0.145                         | 0.100                                        | 0.313         | 148      |
| 2017      | 0.079         | 0.132                         | 0.104                                        | 0.306         | 163      |
| 2018      | 0.143         | 0.131                         | 0.147                                        | 0.391         | 157      |
| 2019      | 0.054         | 0.168                         | 0.106                                        | 0.323         | 174      |
| 2020      | 0.046         | 0.059                         | 0.158                                        | 0.260         | 228      |
| all years | 0.086         | 0.117                         | 0.067                                        | 0.258         | 1546     |

Supplementary Table 26: Summary of scaling fits and diversity adjustment and segregation adjustment variance explained from the gini coefficient for cities with more than 1000 IAT responses.

| year      | scaling $R^2$ | diversity<br>adjustment $R^2$ | adjust-<br>segregation ad-<br>justment $R^2$ | overall $R^2$ | # cities |
|-----------|---------------|-------------------------------|----------------------------------------------|---------------|----------|
| 2010      | 0.053         | 0.143                         | 0.044                                        | 0.291         | 31       |
| 2011      | 0.112         | 0.145                         | 0.010                                        | 0.310         | 31       |
| 2012      | 0.047         | 0.082                         | 0.120                                        | 0.311         | 26       |
| 2013      | 0.052         | 0.195                         | 0.128                                        | 0.410         | 28       |
| 2014      | 0.039         | 0.262                         | 0.079                                        | 0.408         | 34       |
| 2015      | 0.014         | 0.340                         | 0.118                                        | 0.494         | 43       |
| 2016      | 0.115         | 0.227                         | 0.105                                        | 0.434         | 57       |
| 2017      | 0.071         | 0.207                         | 0.136                                        | 0.415         | 61       |
| 2018      | 0.090         | 0.210                         | 0.093                                        | 0.395         | 59       |
| 2019      | 0.054         | 0.169                         | 0.078                                        | 0.317         | 61       |
| 2020      | 0.041         | 0.147                         | 0.205                                        | 0.393         | 89       |
| all years | 0.076         | 0.201                         | 0.111                                        | 0.371         | 520      |

Supplementary Table 27: Summary of scaling fits and diversity adjustment and segregation variance explained for cities with more than 500 IAT responses.

| year      | scaling $R^2$ | diversity<br>adjustment $R^2$ | adjust-<br>segregation ad-<br>justment $R^2$ | overall $R^2$ | # cities |
|-----------|---------------|-------------------------------|----------------------------------------------|---------------|----------|
| 2010      | 0.122         | 0.180                         | 0.008                                        | 0.327         | 64       |
| 2011      | 0.086         | 0.134                         | -0.003                                       | 0.246         | 59       |
| 2012      | 0.130         | 0.266                         | -0.014                                       | 0.400         | 46       |
| 2013      | 0.164         | 0.194                         | -0.008                                       | 0.368         | 52       |
| 2014      | 0.125         | 0.105                         | -0.012                                       | 0.242         | 66       |
| 2015      | 0.053         | 0.216                         | 0.055                                        | 0.336         | 74       |
| 2016      | 0.112         | 0.121                         | 0.041                                        | 0.277         | 91       |
| 2017      | 0.097         | 0.155                         | 0.040                                        | 0.295         | 105      |
| 2018      | 0.114         | 0.170                         | 0.057                                        | 0.335         | 102      |
| 2019      | 0.094         | 0.147                         | 0.007                                        | 0.257         | 106      |
| 2020      | 0.061         | 0.128                         | 0.049                                        | 0.242         | 149      |
| all years | 0.105         | 0.160                         | 0.008                                        | 0.267         | 914      |

Supplementary Table 28: Summary of scaling fits and diversity adjustment and segregation variance explained estimated from the segregation index for cities with more than 500 IAT responses.

| year      | scaling $R^2$ | diversity<br>adjustment $R^2$ | adjust-<br>segregation ad-<br>justment $R^2$ | overall $R^2$ | # cities |
|-----------|---------------|-------------------------------|----------------------------------------------|---------------|----------|
| 2011      | 0.086         | 0.134                         | 0.001                                        | 0.245         | 59       |
| 2012      | 0.130         | 0.266                         | 0.053                                        | 0.448         | 46       |
| 2013      | 0.164         | 0.194                         | 0.066                                        | 0.418         | 52       |
| 2014      | 0.125         | 0.105                         | 0.016                                        | 0.260         | 66       |
| 2015      | 0.053         | 0.216                         | 0.169                                        | 0.436         | 74       |
| 2016      | 0.112         | 0.121                         | 0.128                                        | 0.348         | 91       |
| 2017      | 0.097         | 0.155                         | 0.091                                        | 0.336         | 105      |
| 2018      | 0.114         | 0.170                         | 0.134                                        | 0.397         | 102      |
| 2019      | 0.094         | 0.147                         | 0.083                                        | 0.318         | 106      |
| 2020      | 0.061         | 0.128                         | 0.160                                        | 0.341         | 149      |
| all years | 0.105         | 0.160                         | 0.078                                        | 0.324         | 914      |

Supplementary Table 29: Summary of scaling fits and diversity adjustment and segregation adjustment parameters estimated from the segregation index for cities with more than 500 IAT responses.

| year      | scaling $\beta_1$ | diversity adjustment<br>$\beta_2$ | $s_1 + s_2 \beta_3$ | # cities |
|-----------|-------------------|-----------------------------------|---------------------|----------|
| 2010      | [-0.094,-0.021]   | [-0.303,-0.096]                   | [-0.135,0.214]      | 64       |
| 2011      | [-0.086,-0.010]   | [-0.305,-0.073]                   | [-0.090,0.281]      | 59       |
| 2012      | [-0.080,-0.013]   | [-0.282,-0.107]                   | [0.005,0.261]       | 46       |
| 2013      | [-0.076,-0.019]   | [-0.260,-0.088]                   | [0.020,0.273]       | 52       |
| 2014      | [-0.069,-0.016]   | [-0.209,-0.050]                   | [-0.034,0.226]      | 66       |
| 2015      | [-0.047,-0.003]   | [-0.210,-0.106]                   | [0.114,0.290]       | 74       |
| 2016      | [-0.055,-0.015]   | [-0.174,-0.068]                   | [0.091,0.270]       | 91       |
| 2017      | [-0.059,-0.016]   | [-0.210,-0.098]                   | [0.090,0.302]       | 105      |
| 2018      | [-0.061,-0.019]   | [-0.238,-0.120]                   | [0.137,0.354]       | 102      |
| 2019      | [-0.063,-0.017]   | [-0.229,-0.105]                   | [0.091,0.331]       | 106      |
| 2020      | [-0.044,-0.011]   | [-0.183,-0.093]                   | [0.178,0.362]       | 149      |
| all years | [-0.045,-0.031]   | [-0.179,-0.139]                   | [0.135,0.201]       | 914      |

Supplementary Table 30: Summary of scaling fits and diversity adjustment and segregation variance explained estimated from the gini coefficient for cities with more than 500 IAT responses.

| year      | scaling $R^2$ | diversity<br>adjustment $R^2$ | adjust-<br>segregation ad-<br>justment $R^2$ | overall $R^2$ | # cities |
|-----------|---------------|-------------------------------|----------------------------------------------|---------------|----------|
| 2010      | 0.122         | 0.180                         | -0.009                                       | 0.309         | 64       |
| 2011      | 0.086         | 0.134                         | 0.008                                        | 0.251         | 59       |
| 2012      | 0.130         | 0.266                         | 0.053                                        | 0.448         | 46       |
| 2013      | 0.164         | 0.194                         | 0.058                                        | 0.413         | 52       |
| 2014      | 0.125         | 0.105                         | 0.018                                        | 0.261         | 66       |
| 2015      | 0.053         | 0.216                         | 0.166                                        | 0.433         | 74       |
| 2016      | 0.112         | 0.121                         | 0.135                                        | 0.354         | 91       |
| 2017      | 0.097         | 0.155                         | 0.099                                        | 0.343         | 105      |
| 2018      | 0.114         | 0.170                         | 0.143                                        | 0.405         | 102      |
| 2019      | 0.094         | 0.147                         | 0.080                                        | 0.316         | 106      |
| 2020      | 0.061         | 0.128                         | 0.170                                        | 0.350         | 149      |
| all years | 0.105         | 0.160                         | 0.082                                        | 0.327         | 914      |

Supplementary Table 31: Summary of scaling fits and diversity adjustment and segregation adjustment parameters estimated from the gini coefficient for cities with more than 500 IAT responses.

| year      | scaling $\beta_1$ | diversity adjustment<br>$\beta_2$ | $s_1 + s_2 \beta_3$ | # cities |
|-----------|-------------------|-----------------------------------|---------------------|----------|
| 2010      | [-0.094,-0.021]   | [-0.305,-0.097]                   | [-0.118,0.206]      | 64       |
| 2011      | [-0.086,-0.010]   | [-0.310,-0.077]                   | [-0.066,0.276]      | 59       |
| 2012      | [-0.080,-0.013]   | [-0.285,-0.110]                   | [0.005,0.239]       | 46       |
| 2013      | [-0.076,-0.019]   | [-0.262,-0.088]                   | [0.012,0.243]       | 52       |
| 2014      | [-0.069,-0.016]   | [-0.212,-0.052]                   | [-0.029,0.207]      | 66       |
| 2015      | [-0.047,-0.003]   | [-0.213,-0.108]                   | [0.099,0.256]       | 74       |
| 2016      | [-0.055,-0.015]   | [-0.177,-0.071]                   | [0.084,0.240]       | 91       |
| 2017      | [-0.059,-0.016]   | [-0.212,-0.100]                   | [0.086,0.270]       | 105      |
| 2018      | [-0.061,-0.019]   | [-0.241,-0.124]                   | [0.127,0.315]       | 102      |
| 2019      | [-0.063,-0.017]   | [-0.232,-0.106]                   | [0.076,0.283]       | 106      |
| 2020      | [-0.044,-0.011]   | [-0.187,-0.097]                   | [0.163,0.321]       | 149      |
| all years | [-0.045,-0.031]   | [-0.182,-0.142]                   | [0.164,0.241]       | 914      |

Supplementary Table 32: Summary of scaling fits and diversity adjustment and segregation variance explained estimated from the  $\eta^2$  measure for cities with more than 500 IAT responses.

| year      | scaling $R^2$ | diversity<br>adjustment $R^2$ | adjust-<br>segregation ad-<br>justment $R^2$ | overall $R^2$ | # cities |
|-----------|---------------|-------------------------------|----------------------------------------------|---------------|----------|
| 2010      | 0.122         | 0.180                         | -0.010                                       | 0.309         | 64       |
| 2011      | 0.086         | 0.134                         | -0.001                                       | 0.244         | 59       |
| 2012      | 0.130         | 0.266                         | 0.043                                        | 0.442         | 46       |
| 2013      | 0.164         | 0.194                         | 0.062                                        | 0.418         | 52       |
| 2014      | 0.125         | 0.105                         | 0.015                                        | 0.260         | 66       |
| 2015      | 0.053         | 0.216                         | 0.140                                        | 0.410         | 74       |
| 2016      | 0.112         | 0.121                         | 0.091                                        | 0.317         | 91       |
| 2017      | 0.097         | 0.155                         | 0.097                                        | 0.341         | 105      |
| 2018      | 0.114         | 0.170                         | 0.116                                        | 0.382         | 102      |
| 2019      | 0.094         | 0.147                         | 0.056                                        | 0.296         | 106      |
| 2020      | 0.061         | 0.128                         | 0.115                                        | 0.300         | 149      |
| all years | 0.105         | 0.160                         | 0.056                                        | 0.305         | 914      |

Supplementary Table 33: Summary of scaling fits and diversity adjustment and segregation adjustment parameters estimated from the  $\eta^2$  measure for cities with more than 500 IAT responses.

| year      | scaling $\beta_1$ | diversity adjustment<br>$\beta_2$ | $s_1 + s_2 \beta_3$ | # cities |
|-----------|-------------------|-----------------------------------|---------------------|----------|
| 2010      | [-0.094,-0.021]   | [-0.334,-0.091]                   | [-0.105,0.177]      | 64       |
| 2011      | [-0.086,-0.010]   | [-0.348,-0.081]                   | [-0.077,0.224]      | 59       |
| 2012      | [-0.080,-0.013]   | [-0.329,-0.131]                   | [-0.004,0.204]      | 46       |
| 2013      | [-0.076,-0.019]   | [-0.314,-0.118]                   | [0.014,0.228]       | 52       |
| 2014      | [-0.069,-0.016]   | [-0.249,-0.059]                   | [-0.031,0.195]      | 66       |
| 2015      | [-0.047,-0.003]   | [-0.269,-0.142]                   | [0.083,0.242]       | 74       |
| 2016      | [-0.055,-0.015]   | [-0.230,-0.101]                   | [0.057,0.221]       | 91       |
| 2017      | [-0.059,-0.016]   | [-0.276,-0.140]                   | [0.086,0.277]       | 105      |
| 2018      | [-0.061,-0.019]   | [-0.309,-0.164]                   | [0.108,0.306]       | 102      |
| 2019      | [-0.063,-0.017]   | [-0.285,-0.130]                   | [0.049,0.265]       | 106      |
| 2020      | [-0.044,-0.011]   | [-0.255,-0.143]                   | [0.118,0.280]       | 149      |
| all years | [-0.045,-0.031]   | [-0.229,-0.181]                   | [0.050,0.077]       | 914      |



Supplementary Table 34: Comparison of noise ceiling estimates and full sample  $R^2$  for the deviance measure of segregation a threshold of  $>500$  responses per city.

| year | noise ceiling $R^2$ range | Full Sample $R^2$ | Lower Bound Noise Corrected $R^2$ |
|------|---------------------------|-------------------|-----------------------------------|
| 2010 | [0.70, 0.92]              | 0.34              | 0.48                              |
| 2011 | [0.68, 0.91]              | 0.26              | 0.38                              |
| 2012 | [0.53, 0.86]              | 0.41              | 0.78                              |
| 2013 | [0.53, 0.86]              | 0.38              | 0.72                              |
| 2014 | [0.54, 0.87]              | 0.25              | 0.47                              |
| 2015 | [0.37, 0.80]              | 0.34              | 0.93                              |
| 2016 | [0.45, 0.84]              | 0.29              | 0.63                              |
| 2017 | [0.62, 0.89]              | 0.30              | 0.49                              |
| 2018 | [0.60, 0.89]              | 0.34              | 0.57                              |
| 2019 | [0.57, 0.88]              | 0.26              | 0.47                              |
| 2020 | [0.45, 0.83]              | 0.25              | 0.55                              |

Supplementary Table 35: Comparison of noise ceiling estimates and full sample  $R^2$  for the deviance measure of segregation a threshold of  $>250$  responses per city.

| year | Full Sample $R^2$ | Lower Bound Noise Corrected $R^2$ |
|------|-------------------|-----------------------------------|
| 2010 | 0.26              | 0.47                              |
| 2011 | 0.20              | 0.37                              |
| 2012 | 0.23              | 0.54                              |
| 2013 | 0.24              | 0.70                              |
| 2014 | 0.18              | 0.49                              |
| 2015 | 0.22              | 0.57                              |
| 2016 | 0.25              | 0.69                              |
| 2017 | 0.24              | 0.51                              |
| 2018 | 0.33              | 0.72                              |
| 2019 | 0.24              | 0.55                              |
| 2020 | 0.15              | 0.45                              |

Supplementary Table 36: Comparison of noise ceiling estimates and full sample  $R^2$  for the deviance measure of segregation a threshold of  $>1000$  responses per city.

| year | Full Sample $R^2$ | Lower Bound Noise Corrected $R^2$ |
|------|-------------------|-----------------------------------|
| 2010 | 0.26              | 0.37                              |
| 2011 | 0.31              | 0.41                              |
| 2012 | 0.23              | 0.41                              |
| 2013 | 0.34              | 0.65                              |
| 2014 | 0.39              | 0.77                              |
| 2015 | 0.45              | 0.79                              |
| 2016 | 0.38              | 0.76                              |
| 2017 | 0.35              | 0.55                              |
| 2018 | 0.35              | 0.50                              |
| 2019 | 0.26              | 0.36                              |
| 2020 | 0.30              | 0.50                              |

Supplementary Table 37: Comparison of noise ceiling estimates and full sample  $R^2$  for the  $\eta^2$  measure of segregation and a threshold of  $>500$  responses per city.

| year | Full Sample $R^2$ | Lower Bound Noise Corrected $R^2$ |
|------|-------------------|-----------------------------------|
| 2010 | 0.32              | 0.46                              |
| 2011 | 0.26              | 0.38                              |
| 2012 | 0.45              | 0.86                              |
| 2013 | 0.43              | 0.81                              |
| 2014 | 0.27              | 0.51                              |
| 2015 | 0.42              | 1.13                              |
| 2016 | 0.32              | 0.72                              |
| 2017 | 0.35              | 0.56                              |
| 2018 | 0.39              | 0.65                              |
| 2019 | 0.30              | 0.53                              |
| 2020 | 0.30              | 0.68                              |

Supplementary Table 38: Comparison of noise ceiling estimates and full sample  $R^2$  for the  $\eta^2$  measure of segregation and a threshold of  $>250$  responses per city.

| year | Full Sample $R^2$ | Lower Bound Noise Corrected $R^2$ |
|------|-------------------|-----------------------------------|
| 2010 | 0.27              | 0.49                              |
| 2011 | 0.21              | 0.39                              |
| 2012 | 0.24              | 0.55                              |
| 2013 | 0.27              | 0.79                              |
| 2014 | 0.19              | 0.51                              |
| 2015 | 0.25              | 0.65                              |
| 2016 | 0.28              | 0.75                              |
| 2017 | 0.28              | 0.61                              |
| 2018 | 0.37              | 0.81                              |
| 2019 | 0.28              | 0.64                              |
| 2020 | 0.20              | 0.59                              |

Supplementary Table 39: Comparison of noise ceiling estimates and full sample  $R^2$  for the  $\eta^2$  measure of segregation and a threshold of  $>1000$  responses per city.

| year | Full Sample $R^2$ | Lower Bound Noise Corrected $R^2$ |
|------|-------------------|-----------------------------------|
| 2010 | 0.30              | 0.42                              |
| 2011 | 0.32              | 0.43                              |
| 2012 | 0.30              | 0.54                              |
| 2013 | 0.42              | 0.80                              |
| 2014 | 0.43              | 0.85                              |
| 2015 | 0.51              | 0.90                              |
| 2016 | 0.44              | 0.88                              |
| 2017 | 0.42              | 0.65                              |
| 2018 | 0.40              | 0.58                              |
| 2019 | 0.32              | 0.44                              |
| 2020 | 0.37              | 0.61                              |

Supplementary Table 40: Comparison of noise ceiling estimates and full sample  $R^2$  for the gini coefficient measure of segregation and a threshold of >500 responses per city.

| year | Full Sample $R^2$ | Lower Bound Noise Corrected $R^2$ |
|------|-------------------|-----------------------------------|
| 2010 | 0.32              | 0.46                              |
| 2011 | 0.26              | 0.39                              |
| 2012 | 0.46              | 0.87                              |
| 2013 | 0.42              | 0.80                              |
| 2014 | 0.27              | 0.51                              |
| 2015 | 0.44              | 1.19                              |
| 2016 | 0.36              | 0.80                              |
| 2017 | 0.35              | 0.56                              |
| 2018 | 0.41              | 0.68                              |
| 2019 | 0.32              | 0.57                              |
| 2020 | 0.35              | 0.80                              |

Supplementary Table 41: Comparison of noise ceiling estimates and full sample  $R^2$  for the gini coefficient measure of segregation and a threshold of >250 responses per city.

| year | Full Sample $R^2$ | Lower Bound Noise Corrected $R^2$ |
|------|-------------------|-----------------------------------|
| 2010 | 0.29              | 0.52                              |
| 2011 | 0.22              | 0.41                              |
| 2012 | 0.24              | 0.55                              |
| 2013 | 0.29              | 0.84                              |
| 2014 | 0.19              | 0.53                              |
| 2015 | 0.26              | 0.69                              |
| 2016 | 0.32              | 0.87                              |
| 2017 | 0.31              | 0.67                              |
| 2018 | 0.39              | 0.86                              |
| 2019 | 0.33              | 0.75                              |
| 2020 | 0.26              | 0.77                              |

Supplementary Table 42: Comparison of noise ceiling estimates and full sample  $R^2$  for the gini coefficient measure of segregation and a threshold of  $>1000$  responses per city.

| year | Full Sample $R^2$ | Lower Bound Noise Corrected $R^2$ |
|------|-------------------|-----------------------------------|
| 2010 | 0.31              | 0.44                              |
| 2011 | 0.33              | 0.45                              |
| 2012 | 0.34              | 0.62                              |
| 2013 | 0.43              | 0.82                              |
| 2014 | 0.43              | 0.84                              |
| 2015 | 0.51              | 0.89                              |
| 2016 | 0.44              | 0.88                              |
| 2017 | 0.43              | 0.66                              |
| 2018 | 0.41              | 0.58                              |
| 2019 | 0.33              | 0.46                              |
| 2020 | 0.40              | 0.67                              |

Supplementary Table 43: Comparison of noise ceiling estimates and full sample  $R^2$  for the segregation index measure of segregation and a threshold of  $>500$  responses per city.

| year | Full Sample $R^2$ | Lower Bound Noise Corrected $R^2$ |
|------|-------------------|-----------------------------------|
| 2010 | 0.32              | 0.45                              |
| 2011 | 0.26              | 0.38                              |
| 2012 | 0.46              | 0.87                              |
| 2013 | 0.43              | 0.81                              |
| 2014 | 0.27              | 0.51                              |
| 2015 | 0.44              | 1.20                              |
| 2016 | 0.36              | 0.78                              |
| 2017 | 0.34              | 0.55                              |
| 2018 | 0.40              | 0.67                              |
| 2019 | 0.32              | 0.57                              |
| 2020 | 0.35              | 0.78                              |

Supplementary Table 44: Comparison of noise ceiling estimates and full sample  $R^2$  for the segregation index measure of segregation and a threshold of >250 responses per city.

| year | Full Sample $R^2$ | Lower Bound Noise Corrected $R^2$ |
|------|-------------------|-----------------------------------|
| 2010 | 0.28              | 0.50                              |
| 2011 | 0.22              | 0.41                              |
| 2012 | 0.24              | 0.55                              |
| 2013 | 0.28              | 0.83                              |
| 2014 | 0.19              | 0.52                              |
| 2015 | 0.26              | 0.68                              |
| 2016 | 0.31              | 0.85                              |
| 2017 | 0.29              | 0.64                              |
| 2018 | 0.39              | 0.85                              |
| 2019 | 0.32              | 0.74                              |
| 2020 | 0.25              | 0.74                              |

Supplementary Table 45: Comparison of noise ceiling estimates and full sample  $R^2$  for the segregation index measure of segregation and a threshold of >1000 responses per city.

| year | Full Sample $R^2$ | Lower Bound Noise Corrected $R^2$ |
|------|-------------------|-----------------------------------|
| 2010 | 0.31              | 0.44                              |
| 2011 | 0.33              | 0.44                              |
| 2012 | 0.34              | 0.62                              |
| 2013 | 0.44              | 0.83                              |
| 2014 | 0.43              | 0.84                              |
| 2015 | 0.52              | 0.92                              |
| 2016 | 0.45              | 0.90                              |
| 2017 | 0.42              | 0.66                              |
| 2018 | 0.41              | 0.58                              |
| 2019 | 0.34              | 0.47                              |
| 2020 | 0.39              | 0.65                              |
