# Supplementary material for: Implicit racial biases are lower in more populous more diverse and less segregated US cities
Source: Springer Nature journal article supplement (doi:10.1038/s41467-024-45013-8), 2024-02-06
Supplement: MOESM3 [file 41467_2024_45013_MOESM3_ESM.pdf › 41467_2024_45013_MOESM3_ESM.pdf]

### **Description of Additional Supplementary Files**

File Name: Supplementary Data 1

Description: Complete model results and statistics

File Name: Supplementary Data 2

Description: Metropolitan Areas Included by year
