# Supplementary material for: Implicit racial biases are lower in more populous more diverse and less segregated US cities
Source: Nat Commun. 2024 Feb 6;15:961. doi: 10.1038/s41467-024-45013-8 (PMC10847142; doi:10.1038/s41467-024-45013-8)
Supplement: Supplementary file 7 — Source Data [file 41467_2024_45013_MOESM7_ESM.xlsx]

## Sheet: Fig2a
city pop	city mean iat	city residuals
13.4635	-1.22315	-1.34513
13.6885	-1.26157	-1.36211
13.7278	-1.51521	-1.47092
13.6427	-1.27034	-1.38385
11.7259	-1.29059	-1.27664
12.8169	-1.41253	-1.39681
12.3751	-1.12964	-1.2564
13.0376	-1.36638	-1.27132
12.2587	-1.40647	-1.38057
15.5984	-1.59781	-1.45194
13.3135	-1.41786	-1.40567
14.592	-1.49173	-1.46874
14.8453	-1.35843	-1.41581
12.2714	-1.22836	-1.24626
13.6609	-1.5353	-1.38835
12.3218	-1.40277	-1.36572
12.1639	-1.55576	-1.21507
12.027	-1.49592	-1.2834
12.0327	-1.43918	-1.29505
13.5015	-1.36581	-1.34709
15.3955	-1.37012	-1.45663
12.5023	-1.41491	-1.38581
13.9369	-1.2692	-1.35459
12.3003	-1.33503	-1.24432
12.896	-1.15006	-1.27645
13.5366	-1.19698	-1.36995
12.5126	-1.25426	-1.26761
12.3301	-1.35907	-1.37885
13.581	-1.48058	-1.41806
14.7691	-1.39253	-1.44204
12.2897	-1.46802	-1.36967
13.2376	-1.39329	-1.33775
16.0646	-1.39777	-1.46025
14.6104	-1.26689	-1.36989
12.475	-1.33017	-1.3951
12.2417	-1.38349	-1.3434
13.6327	-1.43577	-1.40394
14.5582	-1.37462	-1.40403
11.4314	-1.34255	-1.33075
15.824	-1.46056	-1.50158
12.8486	-1.28691	-1.33375
13.3984	-1.3351	-1.3791
13.4453	-1.25649	-1.33667
15.2782	-1.35268	-1.39664
12.5751	-1.19398	-1.23338
13.3634	-1.59742	-1.42849
13.6431	-1.43653	-1.47831
12.842	-1.65366	-1.34546
12.6609	-1.31967	-1.28282
12.4048	-1.22547	-1.29611
13.1683	-1.76664	-1.44407
12.916	-1.36957	-1.31857
12.9225	-1.30281	-1.35839
12.6987	-1.44416	-1.40434
13.8829	-1.28575	-1.3644
12.6787	-1.13905	-1.3147
13.5509	-1.63093	-1.40847
12.1005	-1.44693	-1.40024
13.7197	-1.25574	-1.39954
13.2616	-1.22276	-1.35933
15.7585	-1.49468	-1.50015
14.5338	-1.32673	-1.39749
12.0606	-1.33016	-1.33116
11.535	-1.36011	-1.35148
13.2985	-1.52012	-1.36586
14.2433	-1.34361	-1.41866
12.4849	-1.33793	-1.34776
14.5782	-1.34237	-1.4032
12.5927	-1.46461	-1.41436
12.0916	-1.20037	-1.34577
13.6669	-1.34481	-1.2969
11.8266	-1.25962	-1.22877
13.467	-1.3352	-1.41736
13.205	-1.21662	-1.30462
13.2136	-1.47802	-1.35393
14.617	-1.50369	-1.51145
13.1505	-1.37991	-1.37248
12.7165	-1.26539	-1.32434
11.8499	-1.25517	-1.23914
14.0484	-1.42517	-1.37578
12.6762	-1.42608	-1.38767
12.4797	-1.35273	-1.36211
13.4003	-1.35424	-1.35069
12.9368	-1.25184	-1.30276
13.666	-1.43436	-1.44149
14.1105	-1.56228	-1.38513
15.6287	-1.42453	-1.46932
14.2707	-1.40166	-1.37392
15.098	-1.34057	-1.43755
11.6874	-1.56439	-1.23613
14.4596	-1.40851	-1.40985
14.0558	-1.6575	-1.38482
16.7736	-1.43296	-1.49695
13.619	-1.16241	-1.3297
13.4194	-1.35963	-1.30747
14.1499	-1.42457	-1.44736
12.5592	-1.47263	-1.3936
13.7538	-1.2878	-1.36423
14.7556	-1.44807	-1.47322
13.2946	-1.48986	-1.37051
12.9085	-1.19075	-1.28955
15.6226	-1.36108	-1.44716
14.659	-1.34502	-1.33809
13.1925	-1.3518	-1.21872
14.7209	-1.5872	-1.44932
13.0843	-1.29393	-1.37446
14.2986	-1.32433	-1.40362
13.3584	-1.34691	-1.28985
14.1252	-1.36199	-1.45302
12.9458	-1.20399	-1.36435
13.0568	-1.49258	-1.43284
14.064	-1.3808	-1.42058
12.6549	-1.27686	-1.33402
12.3007	-1.24014	-1.29485
13.8848	-1.27006	-1.35832
12.7276	-1.15935	-1.35913
14.8474	-1.34526	-1.37561
12.968	-1.44716	-1.40137
14.011	-1.4291	-1.42958
14.7359	-1.50844	-1.47561
12.8744	-1.43668	-1.38743
13.2263	-1.23109	-1.30619
15.1838	-1.53051	-1.50789
12.4854	-1.23027	-1.28857
12.6838	-1.36525	-1.3529
13.2333	-1.41194	-1.33149
12.2464	-1.37368	-1.30961
13.4567	-1.38228	-1.36968
13.0539	-1.21042	-1.25057
11.997	-1.35929	-1.27914
13.3851	-1.24785	-1.32443
12.8604	-1.57967	-1.39346
14.9638	-1.34309	-1.44227
13.375	-1.29248	-1.34368
12.8161	-1.30421	-1.39274
13.8116	-1.38002	-1.45827
14.3859	-1.43777	-1.44069
15.6481	-1.5492	-1.47421
12.0383	-1.22567	-1.26627
13.3687	-1.37897	-1.38336
12.5891	-1.21437	-1.33551
13.4168	-1.33513	-1.37945
13.7572	-1.31925	-1.37543
12.4318	-1.44033	-1.43028
13.0117	-1.1772	-1.29816

## Sheet: Fig2b
noise ceiling estimates		segregation r2	scaling r2	diversity r2	overall r2
0.699146		0.03	0.108	0.144	0.285
0.917881		0.031	0.102	0.142	0.28
0.330266		0.044	0.114	0.171	0.325
0.472385		0.002	0.089	0.154	0.255
0.680906		0.049	0.055	0.14	0.248
0.912354		0.104	0.108	0.144	0.345
0.24937		0.082	0.102	0.142	0.321
0.366232		0.117	0.114	0.171	0.384
0.535409		0.066	0.089	0.154	0.307
0.865203		0.16	0.055	0.14	0.348
0.461684		0.11	0.108	0.144	0.35
0.862302		0.091	0.102	0.142	0.329
0.527932		0.127	0.114	0.171	0.392
0.86268		0.065	0.089	0.154	0.305
0.427187		0.171	0.055	0.14	0.358
0.809172		0.076	0.108	0.144	0.321
0.540117		0.087	0.102	0.142	0.326
0.867021		0.102	0.114	0.171	0.372
0.273285		0.044	0.089	0.154	0.289
0.505973		0.116	0.055	0.14	0.308
0.383642
0.808934
0.383534
0.999718
0.478259
0.845379
0.328867
0.687633
0.632627
0.897504
0.332893
0.526208
0.598789
0.886691
0.377962
0.63121
0.579789
0.880509
0.295761
0.510118
0.474321
0.84407
0.312983
0.659854
0.579695
0.880489
0.279629
0.482373
0.527096
0.862721
0.184982
0.350946
0.429384
0.827112
0.235275
0.547937
0.361954
0.800168
0.285076
0.787602
0.362637
0.800569
0.191062
0.526867
0.381498
0.808349
0.226224
0.592988
0.370563
0.803972
0.276916
0.747285
0.466763
0.841345
0.274632
0.588376
0.457525
0.83793
0.365782
0.79948
0.441435
0.831943
0.270367
0.612472
0.354709
0.797497
0.208
0.586395
0.715386
0.92259
0.311136
0.43492
0.752758
0.93357
0.33532
0.445455
0.56825
0.87603
0.321729
0.566175
0.548695
0.869444
0.378577
0.689959
0.511194
0.856627
0.43166
0.844415
0.530373
0.863407
0.579673
1.09295
0.52658
0.862301
0.409768
0.778168
0.658702
0.905569
0.397422
0.603342
0.715006
0.922608
0.386474
0.540519
0.73083
0.927293
0.30018
0.410739
0.609356
0.89008
0.353766
0.580557

## Sheet: Fig3
learning rate estimate	source
-0.243231	scaling mean
-0.392908	scaling confidence interval lower bound
-0.0935541	scaling confidence interval upper bound
-0.181962	diversity mean
-0.0720648	diversity confidence interval lower bound
-0.291859	diversity confidence interval upper bound
experimental effects
0.777778
0.511628
0.55814
0.511628
0.34
0.64
0.52
0.38
0.380952
0.595238
0.571429
0.761905
0.409836
0.571429
0.765625
0.465517
0.542373
0.535714
0.596491

## Sheet: Fig4
lag	population->bias	population->bias std	bias->population	bias->population std	segregation->bias	segregation->bias std	bias->segregation	bias->segregation std	diversity->bias	diversity->bias std	bias->diversity	bias->diversity std
1	0.738095	0.0679786	0.190476	0.0596589	0.714286	0.0692849	0.214286	0.0623982	0.690476	0.0711592	0.190476	0.0601825
2	0.785714	0.0640209	0.357143	0.0718786	0.690476	0.0716877	0.428571	0.0760952	0.761905	0.0629564	0.380952	0.0752206
3	0.857143	0.0542044	0.761905	0.066795	0.97619	0.0230771	0.809524	0.0596987	0.952381	0.0327432	0.809524	0.0602442
